# Supplementary material for: Rare-metal-free broadband near-infrared phosphors
Source: Research Square preprint supplement (doi:10.21203/rs.3.rs-3959257/v1), 2024-08-16
Supplement: Supplementary file 1 [file 96f824b04d2ad3a2794bcc29.pdf]

# Supplementary Information for

## Rare-metal-free broadband near-infrared phosphors

Guojun Zheng<sup>1,2†</sup>, Chenjie Lou<sup>3†</sup>, Zeyue Yuan<sup>4,5†</sup>, Wenge Xiao<sup>1†\*</sup>, Longbing Shang<sup>4,5</sup>, Jiyou Zhong<sup>6</sup>,  
Mingxue Tang<sup>3\*</sup>, Jianrong Qiu<sup>2\*</sup>

<sup>1</sup>Institute of Light+X Science and Technology, College of Information Science and Engineering, Ningbo University, Ningbo, 315211, China

<sup>2</sup>College of Optical Science and Engineering, Zhejiang University, Hangzhou, 310027, China

<sup>3</sup>Center for High Pressure Science and Technology Advanced Research, Beijing, 100193, China

<sup>4</sup>CAS Key Laboratory of Microscale Magnetic Resonance, School of Physical Sciences, University of Science and Technology of China, Hefei 230026, China

<sup>5</sup>CAS Center for Excellence in Quantum Information and Quantum Physics, University of Science and Technology of China, Hefei 230026, China

<sup>6</sup>School of Physics and Optoelectronic Engineering, Guangdong University of Technology, Guangzhou, 510006, China

†These authors contributed equally to this work.

\* **Corresponding Author:**

Wenge Xiao: [xiaowenge@nbu.edu.cn](mailto:xiaowenge@nbu.edu.cn); Mingxue Tang: [mingxue.tang@hpstar.ac.cn](mailto:mingxue.tang@hpstar.ac.cn); Jianrong Qiu: [qjr@zju.edu.cn](mailto:qjr@zju.edu.cn).

**This PDF file includes:**

Supplementary Figures 1–25

Supplementary Tables 1–23

References 1–15

## Supplementary Figures

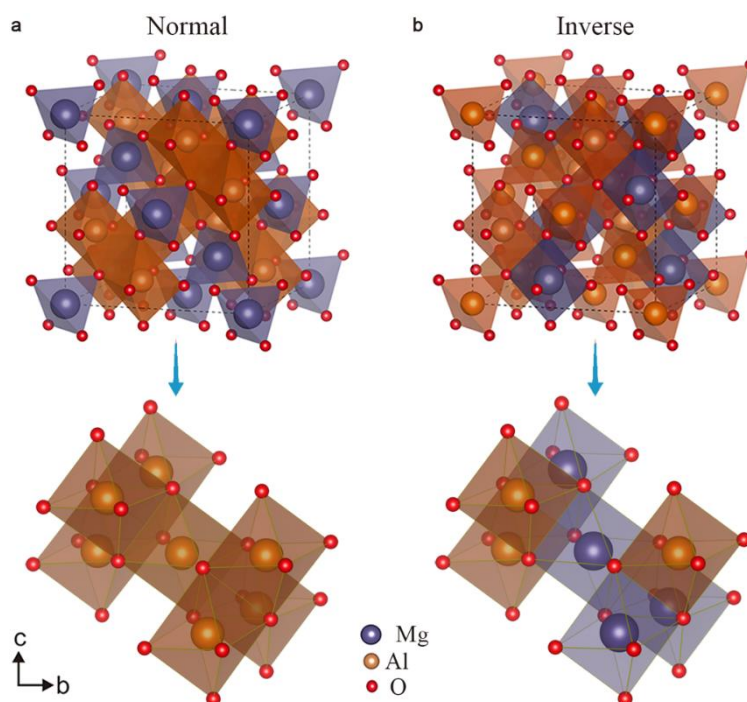

**Supplementary Fig. 1** The ground state atomic configurations of normal and inverse spinel structures exemplified by MAS. In the normal spinel structure (a), all  $\text{Al}^{3+}$  ions are in octahedral coordination with  $D_{3d}$  symmetry, and all  $\text{Mg}^{2+}$  ions are in tetrahedral coordination with  $T_d$  symmetry. The general formula may be written as  $(\text{Mg})[\text{Al}]_2\text{O}_4$  or  $(\text{Mg})_8[\text{Al}]_{16}\text{O}_{32}$  for the cubic cell, where ( ) and [ ] denote tetrahedral and octahedral sites, respectively. There is such a possible configuration where Mg and Al atoms achieve a completely random distribution in octahedral sites, which can be expressed as  $(\text{Al})[\text{MgAl}]\text{O}_4$  and is so-called inverse spinel structure (b).

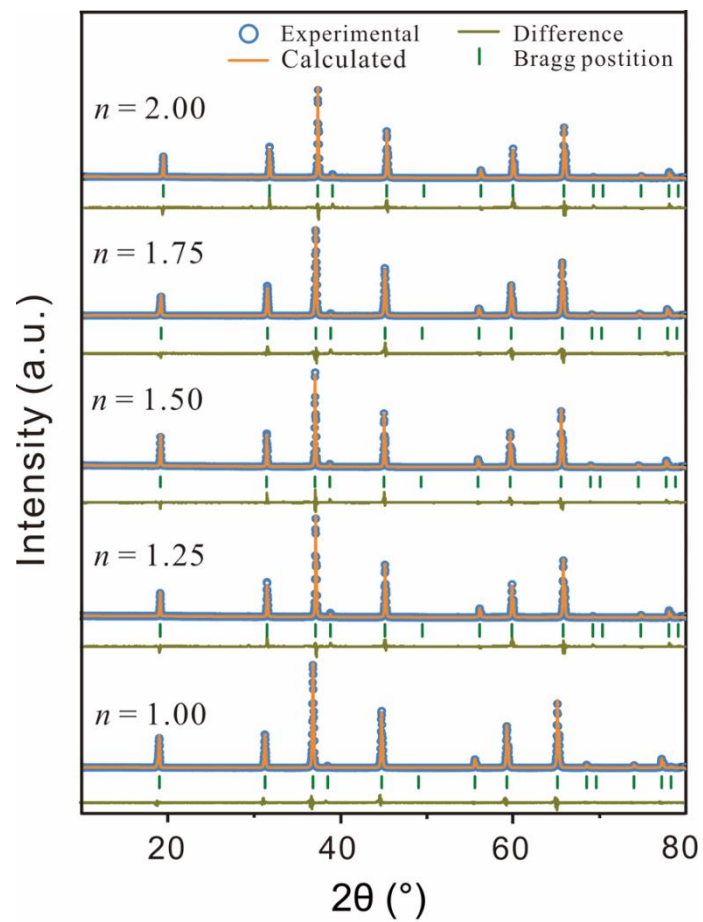

**Supplementary Fig. 2 XRD refinements for MA<sub>n</sub>S:2.0%Cr<sup>3+</sup> with varying Al<sub>2</sub>O<sub>3</sub> contents.**

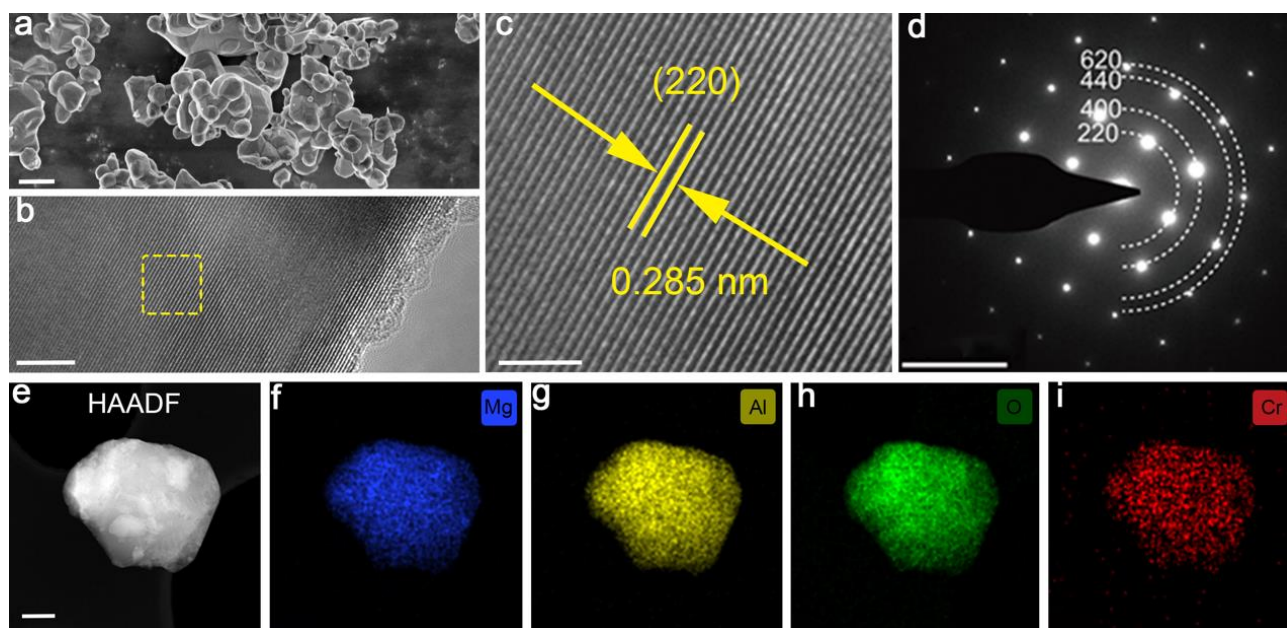

**Supplementary Fig. 3** Microstructure characterizations of MAS:2.0%Cr<sup>3+</sup>. **a**, SEM image (Scale bar, 1 μm). **b,c**, High-resolution TEM images (Scale bar, 5 nm). **d**, Selected area electron diffraction (SAED) patterns (Scale bar, 0.1 nm). **e**, STEM-high angle angular dark field (STEM-HAADF) image. **f-i**, EDS mapping images (Scale bar, 200 nm) indicating a uniform distribution of the compositional elements.

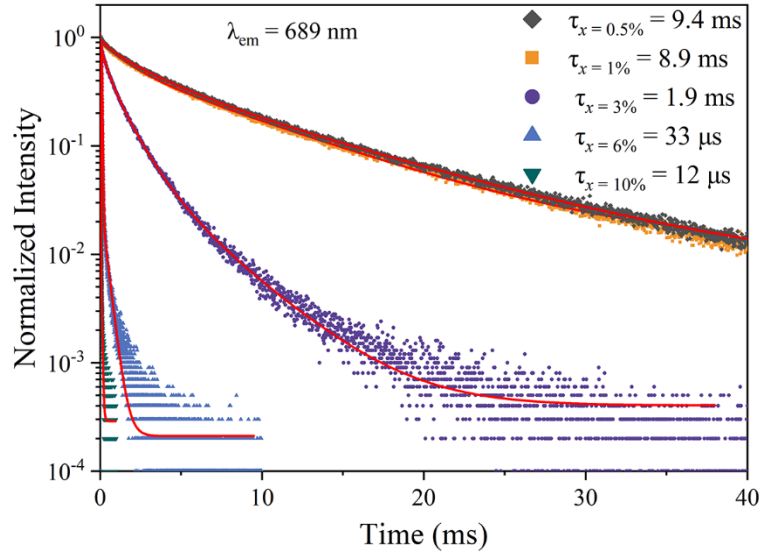

**Supplementary Fig. 4 The PL decay curves of MAS: $x\%$ Cr<sup>3+</sup> ( $x = 0.5, 1.0, 3.0, 6.0, \text{ and } 10.0$ ).**

The PL decay curves were recorded by monitoring the emission at 689 nm. The fitting details are given in Supplementary Table 3. With increasing the Cr<sup>3+</sup> concentration, the PL decays of the strong-field Cr<sup>3+</sup> centers (<sup>2</sup>E→<sup>4</sup>A<sub>2</sub>) become faster with the average lifetime calculated decreasing from 9.4 ms for  $x = 0.5\%$  to 1.9 ms for  $x = 3.0\%$ , which confirms the efficient nonradiative energy transfer. Note that the very fast part (dozens of microseconds in average lifetime) in the decay curves for  $x = 6.0\%$  and  $10.0\%$  are mainly due to the detected emission from <sup>4</sup>T<sub>2</sub>→<sup>4</sup>A<sub>2</sub> transitions, since broadband NIR emission becomes dominant at these high concentrations.

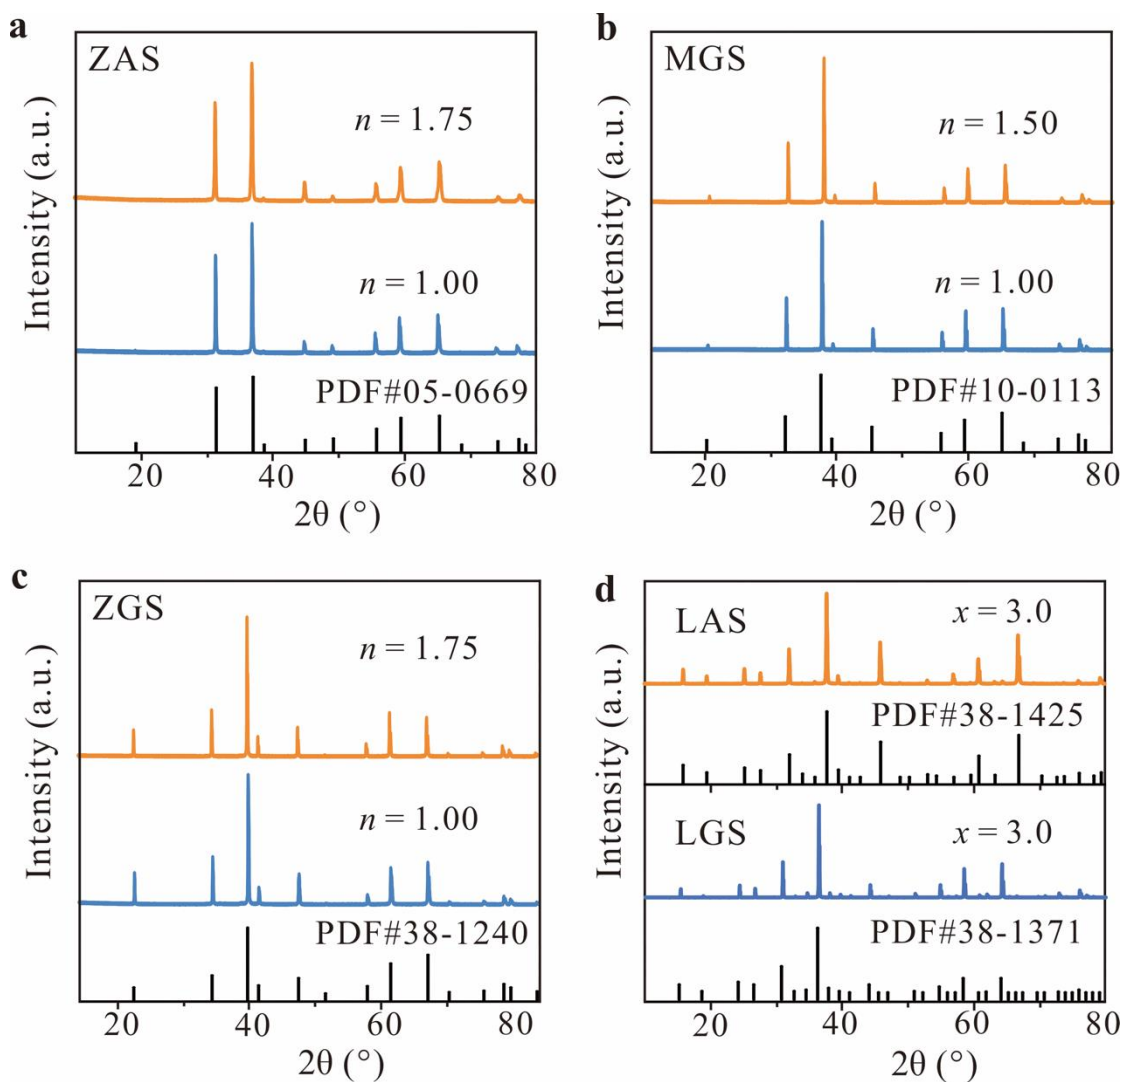

**Supplementary Fig. 5 XRD patterns of several representative spinel phosphors. a, ZAS. b, MGS. c, ZGS. d, LAS and LGS. All of the stoichiometric and non-stoichiometric samples have pure spinel phase with XRD patterns matching well with the standard ones.**

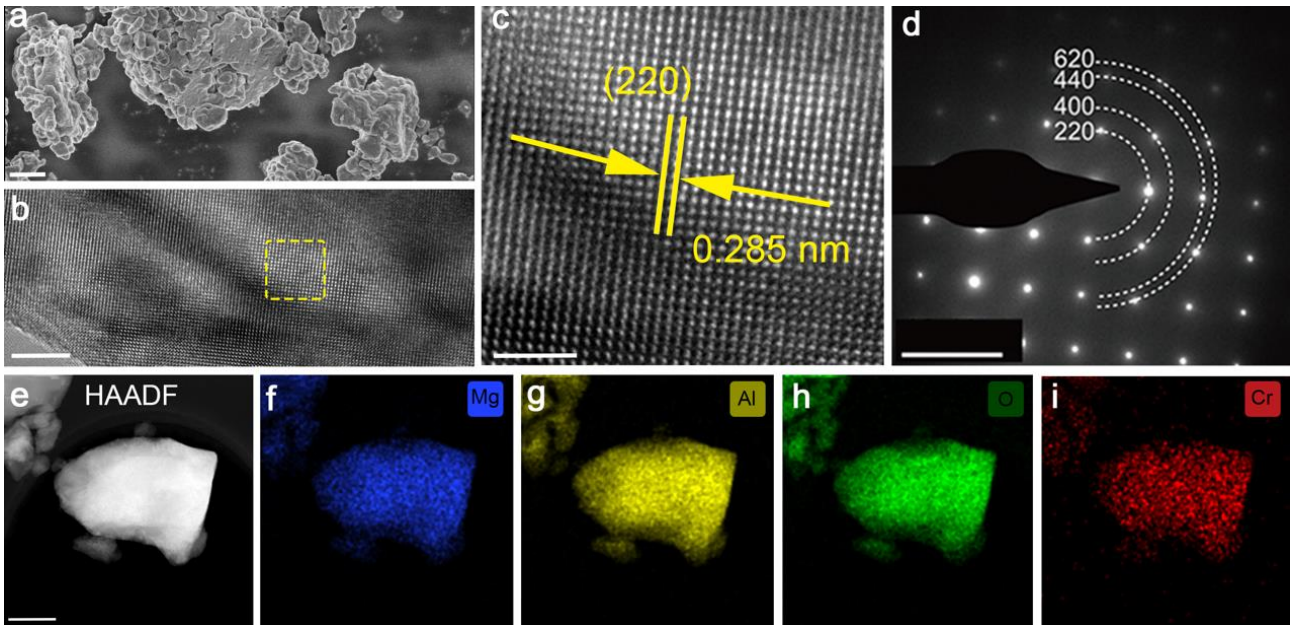

**Supplementary Fig. 6** Microstructure characterizations of  $\text{MA}_{1.75}\text{S}:\text{2.0\%Cr}^{3+}$ . **a**, SEM image (Scale bar, 1  $\mu\text{m}$ ). **b,c**, High-resolution TEM images (Scale bar, 5 nm). **d**, SAED patterns (Scale bar, 0.1 nm). **e**, STEM-HAADF image. **f–i**, EDS mapping images (Scale bar, 200 nm) indicating a uniform distribution of the compositional elements.

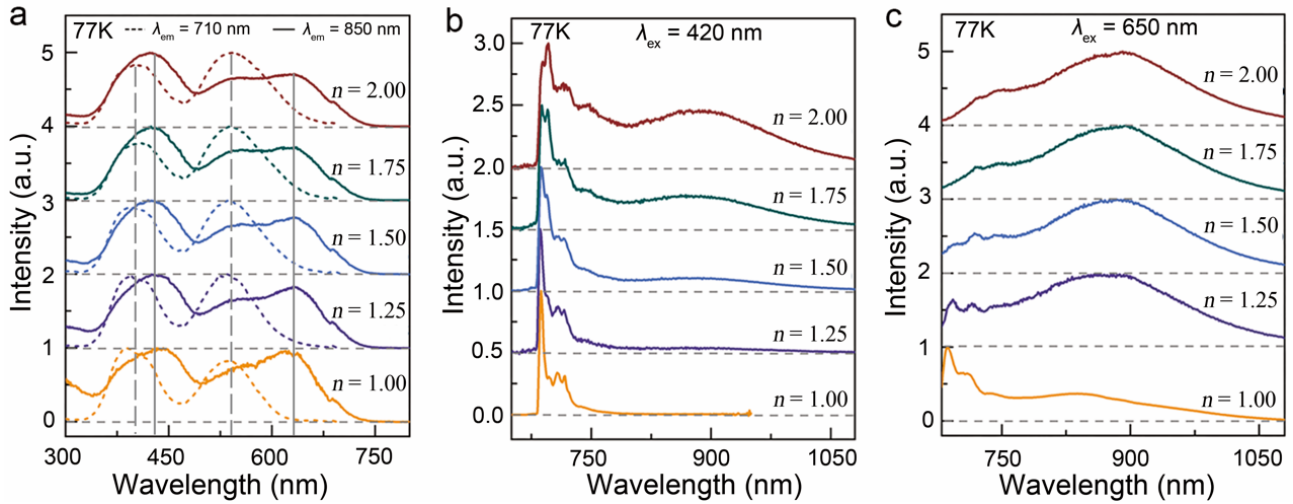

**Supplementary Fig. 7** Normalized PLE and PL spectra of  $\text{MA}_n\text{S}:0.5\%\text{Cr}^{3+}$  at 77 K. **a**, PLE spectra monitoring 710 nm (dash lines) and 850 nm (solid lines). **b**, PL spectra under 420 nm excitation. **c**, PL spectra under 650 nm excitation. With increasing the  $\text{Al}_2\text{O}_3$  content, the broadband NIR emission around 850 nm is gradually enhanced, indicating that the broadening of PL spectra arises from the increased PL intensity of broadband NIR-emitting  $\text{Cr}^{3+}$  centers, rather than a gradual redshift of far-red-emitting  $\text{Cr}^{3+}$  centers induced by the change of crystal field strength at octahedral  $\text{Al}^{3+}$  sites. When the 650 nm light was used to selectively excite the broadband NIR-emitting  $\text{Cr}^{3+}$  centers, the above phenomenon becomes more pronounced.

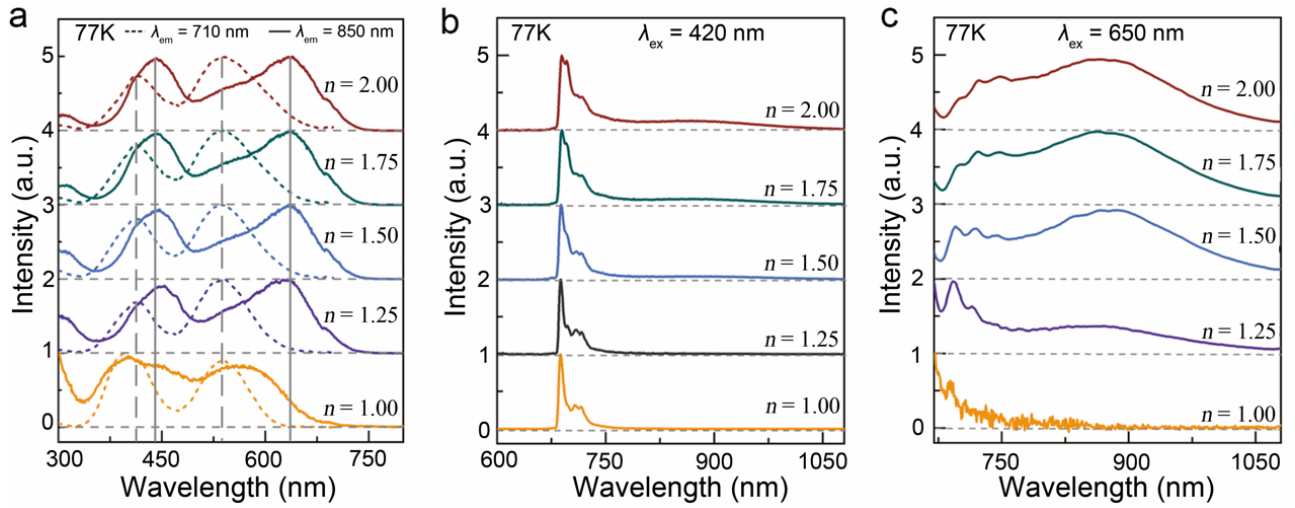

**Supplementary Fig. 8** Normalized PLE and PL spectra of MA<sub>n</sub>S:0.1%Cr<sup>3+</sup> at 77 K. **a**, PLE spectra monitoring 710 nm (dash lines) and 850 nm (solid lines). **b**, PL spectra under 420 nm excitation. **c**, PL spectra under 650 nm excitation. Even at such a low Cr<sup>3+</sup> concentration, the broadband NIR emission can be clearly observed. The crystal field strength (Supplementary Table 8) characterized by the  $Dq/B$  ratio was calculated using the spectroscopic data extracted from these spectra.

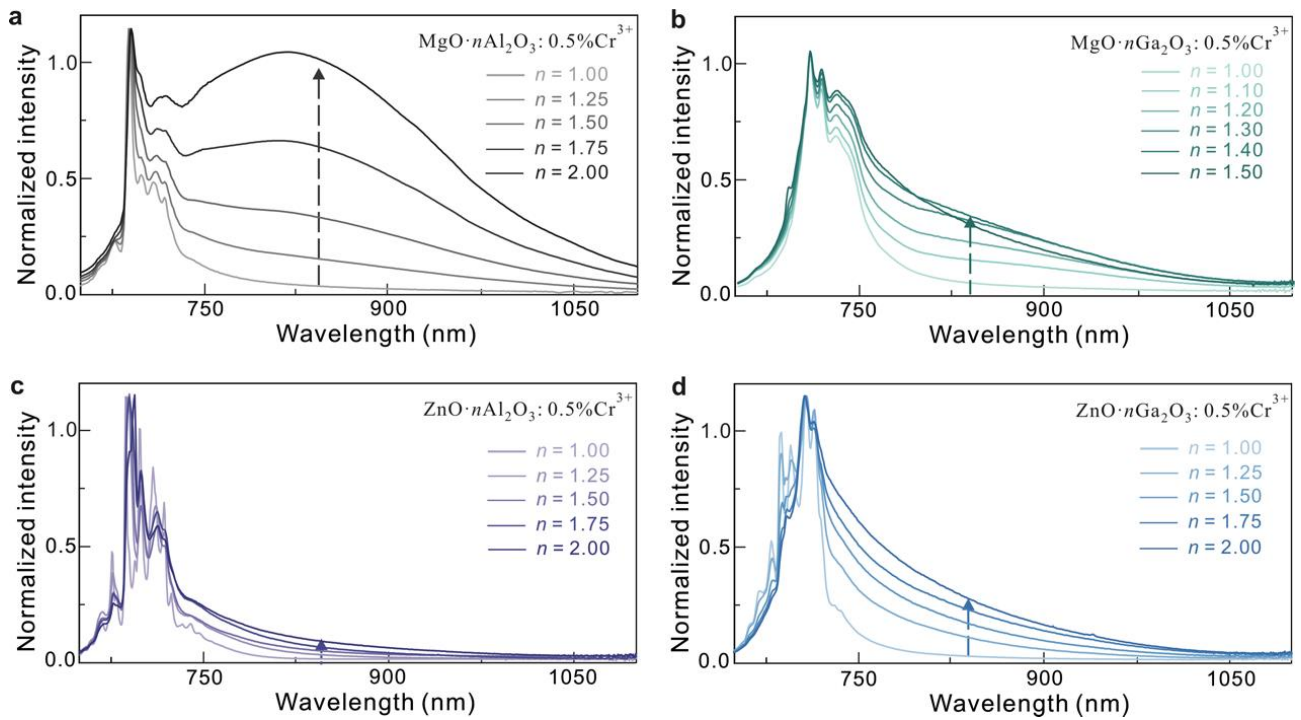

**Supplementary Fig. 9 Normalized PL spectra under 420 nm excitation of Cr<sup>3+</sup> doped spinel phosphors with excess Al<sub>2</sub>O<sub>3</sub>/Ga<sub>2</sub>O<sub>3</sub>. a, MA<sub>n</sub>S:0.5%Cr<sup>3+</sup>. b, MG<sub>n</sub>S:0.5%Cr<sup>3+</sup>. c, ZA<sub>n</sub>S:0.5%Cr<sup>3+</sup>. d, ZG<sub>n</sub>S:0.5%Cr<sup>3+</sup>.**

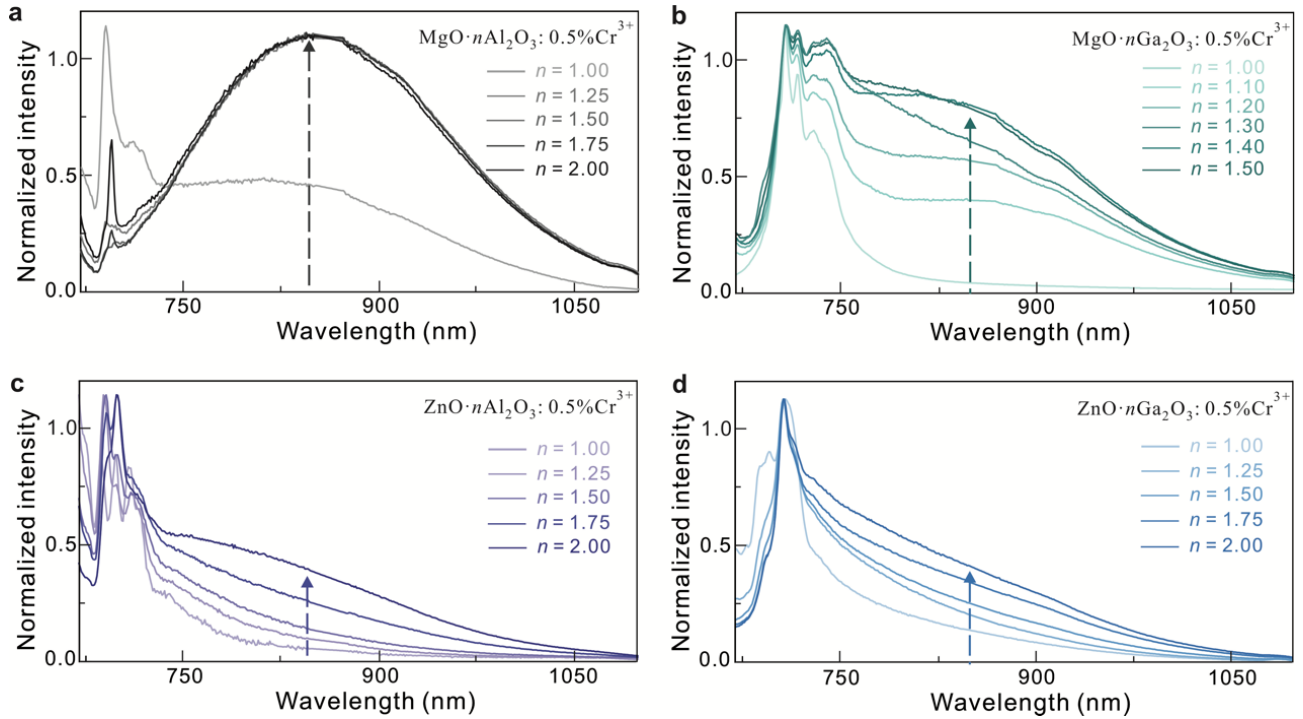

**Supplementary Fig. 10 Normalized PL spectra under 650 nm excitation of Cr<sup>3+</sup> doped spinel phosphors with excess Al<sub>2</sub>O<sub>3</sub>/Ga<sub>2</sub>O<sub>3</sub>. a, MA<sub>n</sub>S:0.5%Cr<sup>3+</sup>. b, MG<sub>n</sub>S:0.5%Cr<sup>3+</sup>. c, ZA<sub>n</sub>S:0.5%Cr<sup>3+</sup>. d, ZG<sub>n</sub>S:0.5%Cr<sup>3+</sup>. When the 650 nm light was used to selectively excite the broadband NIR-emitting Cr<sup>3+</sup> centers, the spectral changes become more pronounced.**

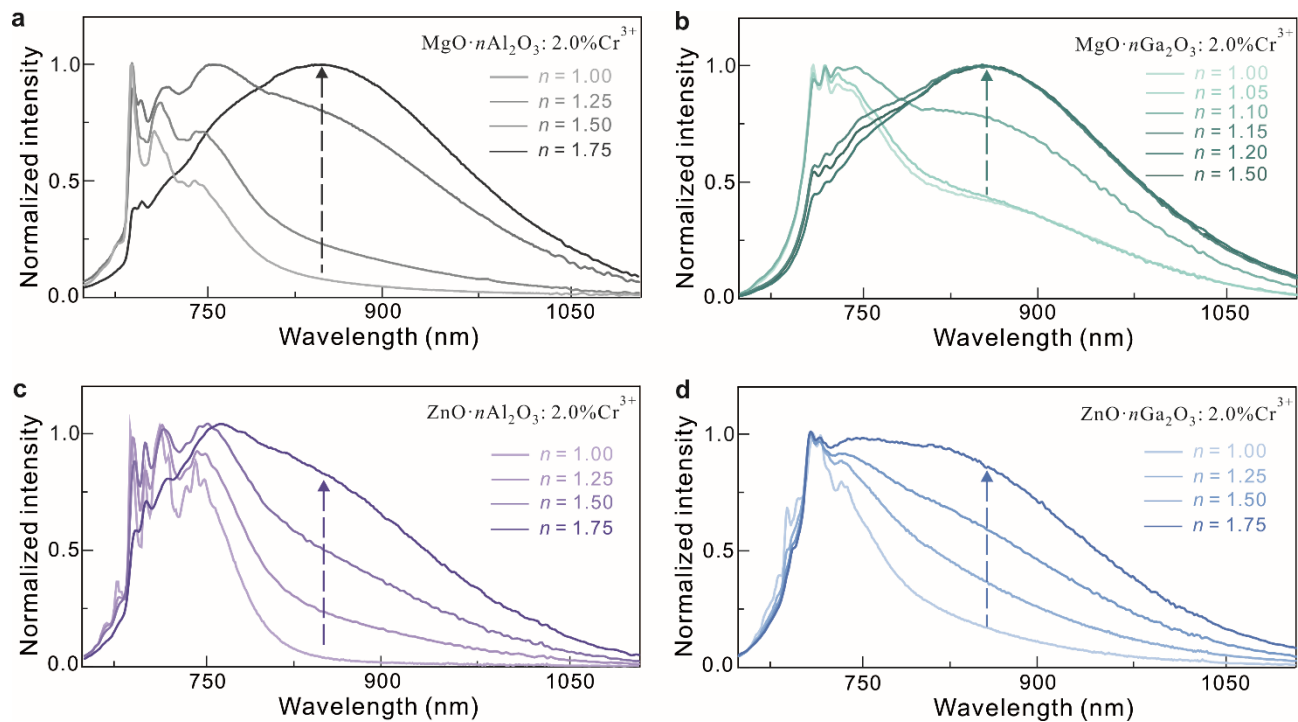

**Supplementary Fig. 11 Normalized PL spectra under 450 nm excitation of Cr<sup>3+</sup> doped spinel phosphors with excess Al<sub>2</sub>O<sub>3</sub>/Ga<sub>2</sub>O<sub>3</sub>. a, MA<sub>n</sub>S:2.0%Cr<sup>3+</sup>. b, MG<sub>n</sub>S:2.0%Cr<sup>3+</sup>. c, ZA<sub>n</sub>S:2.0%Cr<sup>3+</sup>. d, ZG<sub>n</sub>S:2.0%Cr<sup>3+</sup>.**

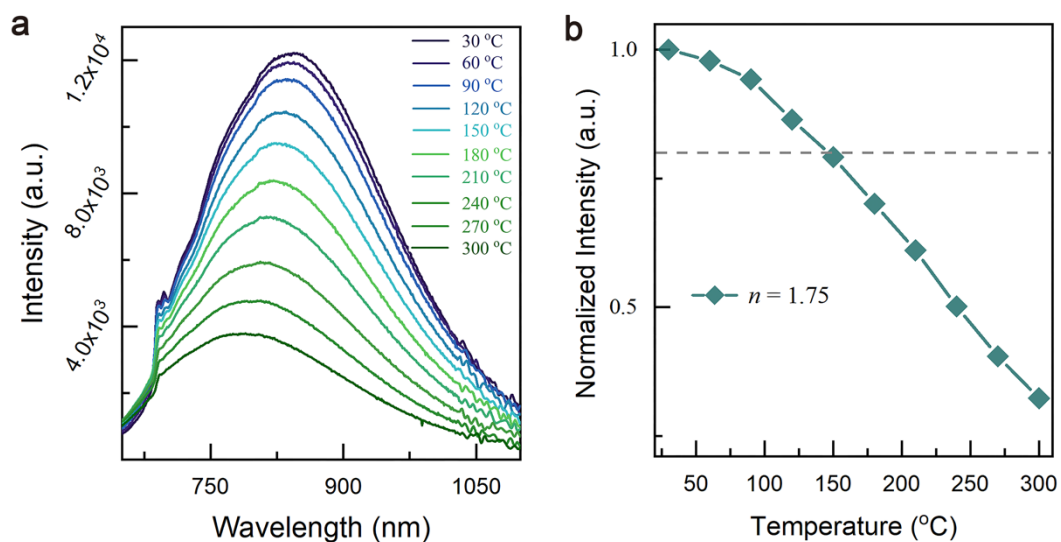

**Supplementary Fig. 12 Temperature-dependent PL properties of MA<sub>1.75</sub>S:2.0%Cr<sup>3+</sup>.** **a**, Temperature-dependent PL spectra. **b**, Integrated PL intensities as a function of the temperature. The PL intensity at 150 °C is as high as 80% of that at room temperature, indicating a weak thermal quenching.

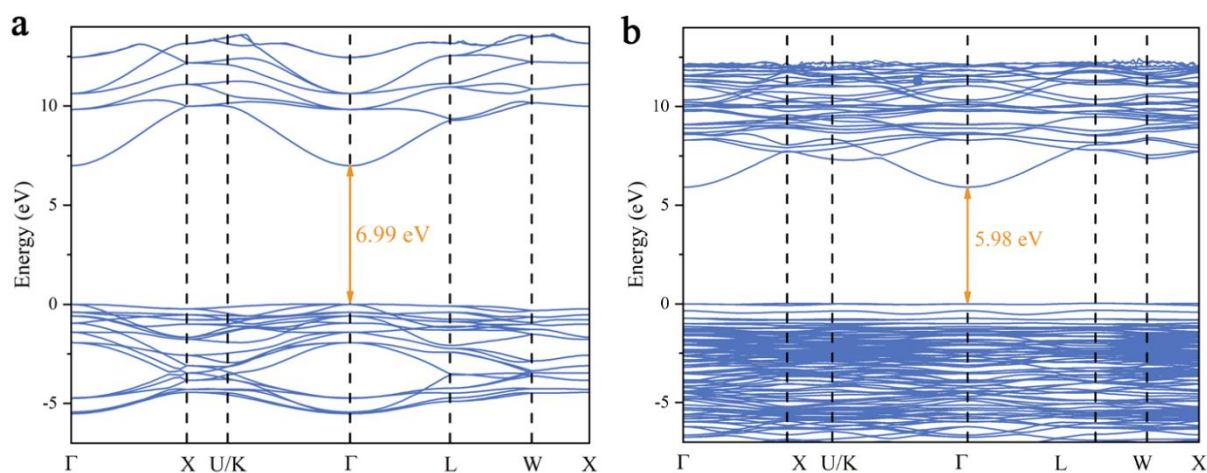

**Supplementary Fig. 13** The electronic band structures of MgAl<sub>2</sub>O<sub>4</sub> and Mg<sub>5</sub>Al<sub>18</sub>O<sub>32</sub> (representing MA<sub>1.75</sub>S) along high symmetric K-points  $\Gamma$ -X-U/K- $\Gamma$ -L-W-X. The band gaps of MAS and MA<sub>1.75</sub>S are calculated to be 6.99 and 5.98 eV, respectively, which are consistent with previous work (ACS Org. Inorg. Au 2024, 4, 120); the smaller band gap for MA<sub>1.75</sub>S is mainly due to the cation vacancies located at the octahedral positions (J. Am. Ceram. Soc., 1997, 80, 1193). Their real values should be a little higher; for example, the band gap of MAS is experimentally determined to be 7.80–8.10 eV (Geochimica et Cosmochimica Acta, 1974, 38, 589; ACS Org. Inorg. Au 2024, 4, 120).

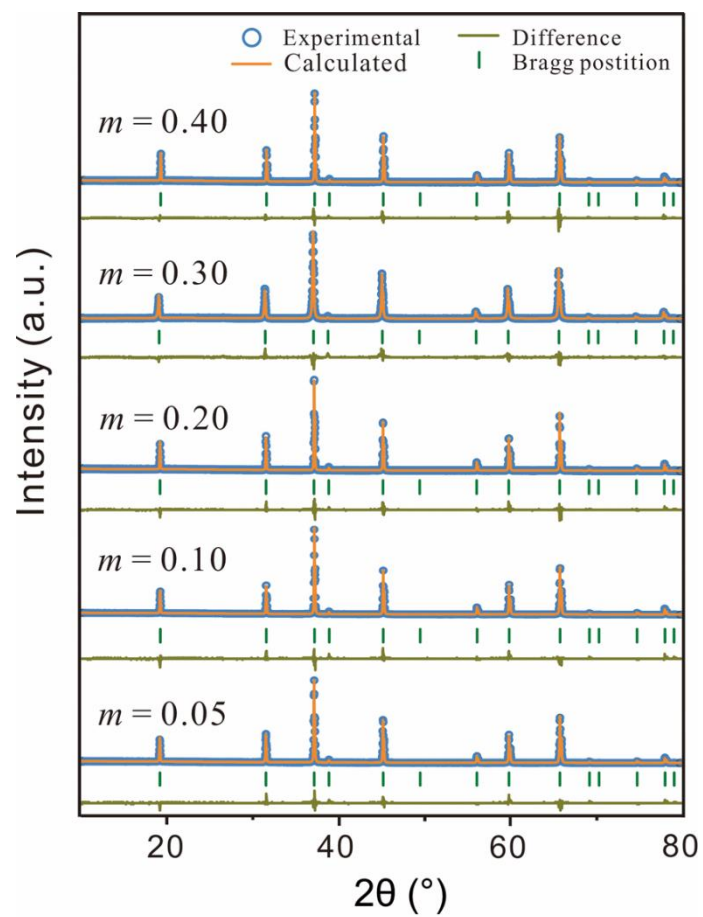

Supplementary Fig. 14 XRD refinements for  $\text{MA}_{1.75}\text{S}:2.0\%\text{Cr}^{3+}, m\text{Si}$ .

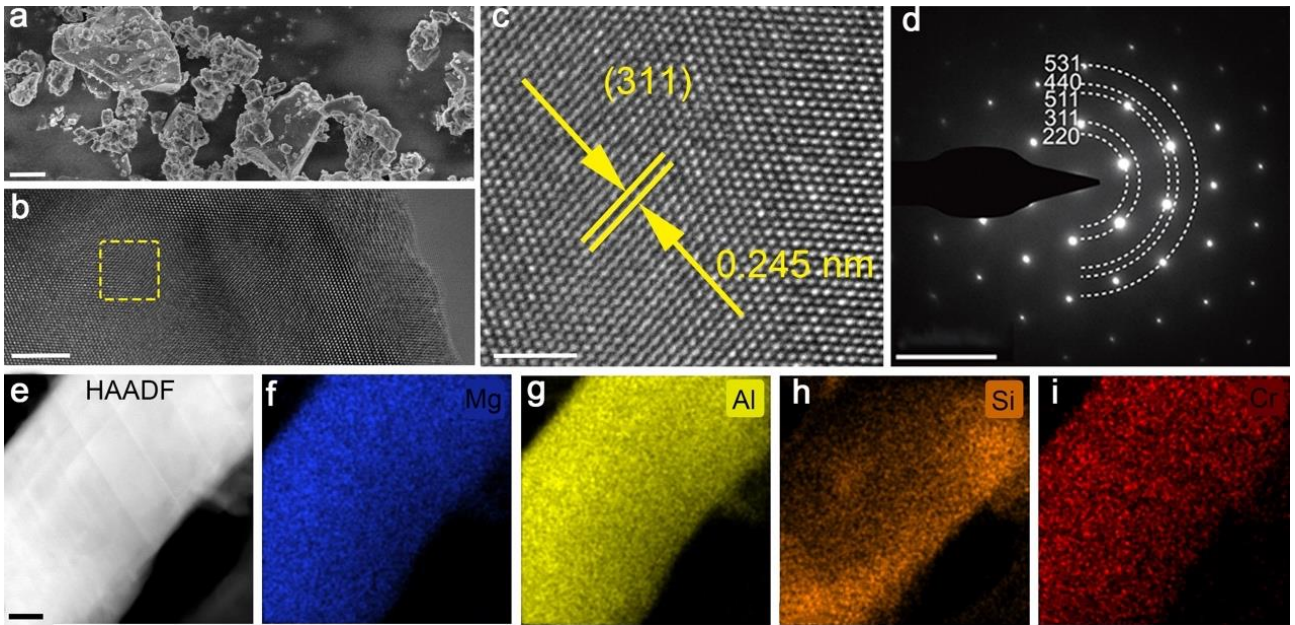

**Supplementary Fig. 15** Microstructure characterizations of  $\text{MA}_{1.75}\text{S}:2.0\%\text{Cr}^{3+},0.30\text{Si}$ . **a**, SEM image (Scale bar, 1  $\mu\text{m}$ ). **b,c**, High-resolution TEM images (Scale bar, 5 nm). **d**, SAED patterns (Scale bar, 0.1 nm). **e**, STEM-HAADF image. **f-i**, EDS mapping images (Scale bar, 200 nm) indicating a uniform distribution of the compositional elements.

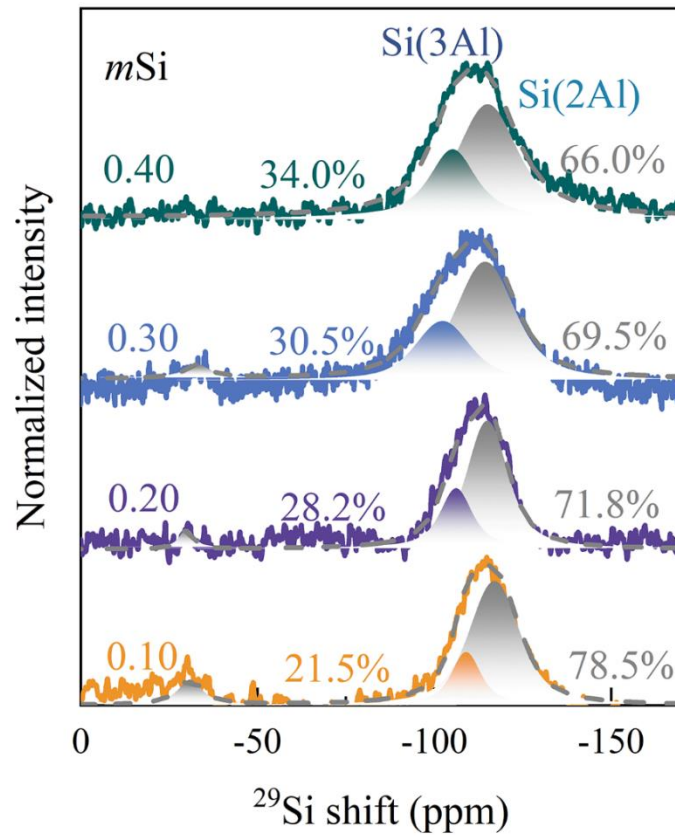

**Supplementary Fig. 16**  $^{29}\text{Si}$  NMR spectra for  $\text{MA}_{1.75}\text{S}:\text{2.0\%Cr}^{3+}, m\text{Si}$ . The solid lines are the measured data and the dashed lines are the total simulations. The assignments and the corresponding calculated occupancies are given next to each component. The results indicate that  $\text{Si}^{4+}$  ions exclusively enter tetrahedral sites.

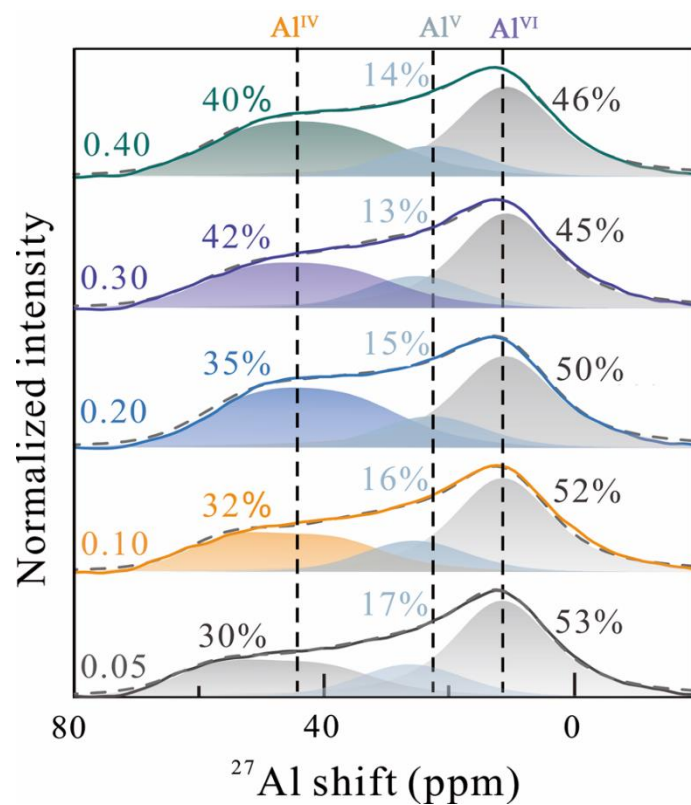

**Supplementary Fig. 17**  $^{27}\text{Al}$  MAS NMR spectra of  $\text{MA}_{1.75}\text{S}:\text{2.0\%Cr}^{3+},m\text{Si}$ . The solid lines are measured data and the dashed lines are the total simulated spectra. The calculated occupancies are given next to each component.

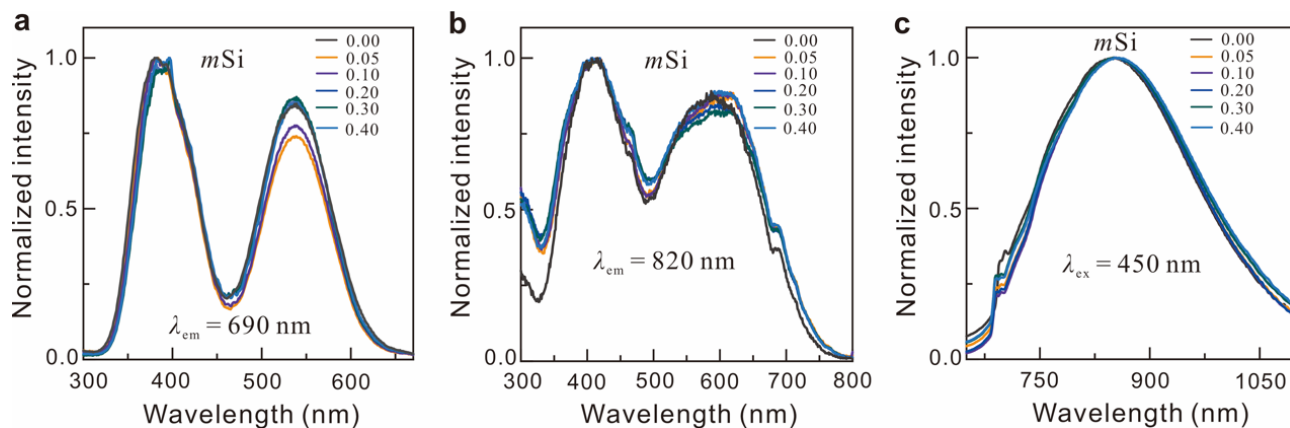

**Supplementary Fig. 18 PLE and PL spectra of MA<sub>1.75</sub>S:2.0%Cr<sup>3+</sup>,mSi.** a,b, Normalized PLE spectra monitoring 690 nm (a) and 820 nm (b). c, Normalized PL spectra under 450 nm excitation. The substitution of smaller Si<sup>4+</sup> for larger Al<sup>3+</sup> would lead to a blueshift in PL spectra according to the crystal field theory; the very small redshift observed here indicates that more weak-field Cr<sup>3+</sup> centers are formed due to the increased cation inversion.

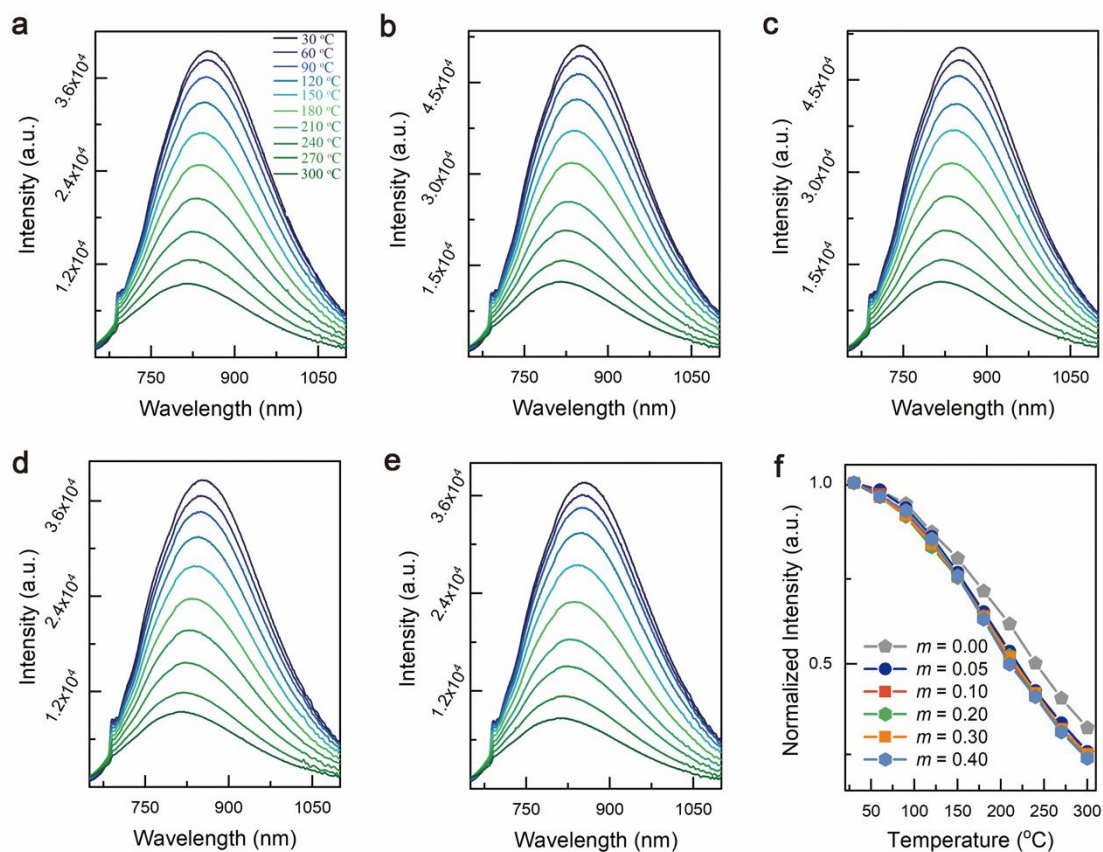

**Supplementary Fig. 19 Temperature-dependent PL properties of MA<sub>1.75</sub>S:2.0%Cr<sup>3+</sup>,*m*Si. a–e,** Temperature-dependent spectra upon 450 nm excitation. **f,** Integrated PL intensities as a function of the temperature. The PL intensity for all the Si-substituted samples at 150 °C is as high as 77% of that at room temperature.

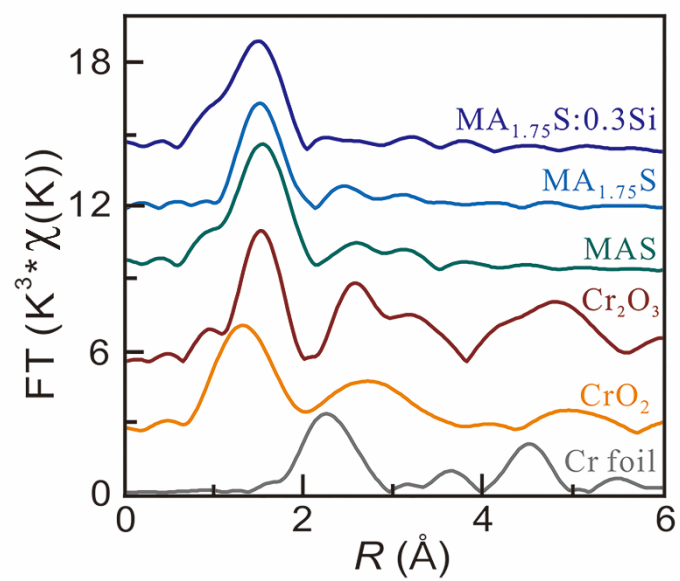

**Supplementary Fig. 20** The  $k^3$  weighted forward Fourier transformed EXAFS spectra in  $R$  space of  $\text{Cr}^{3+}$  for three representative samples and the standard samples.

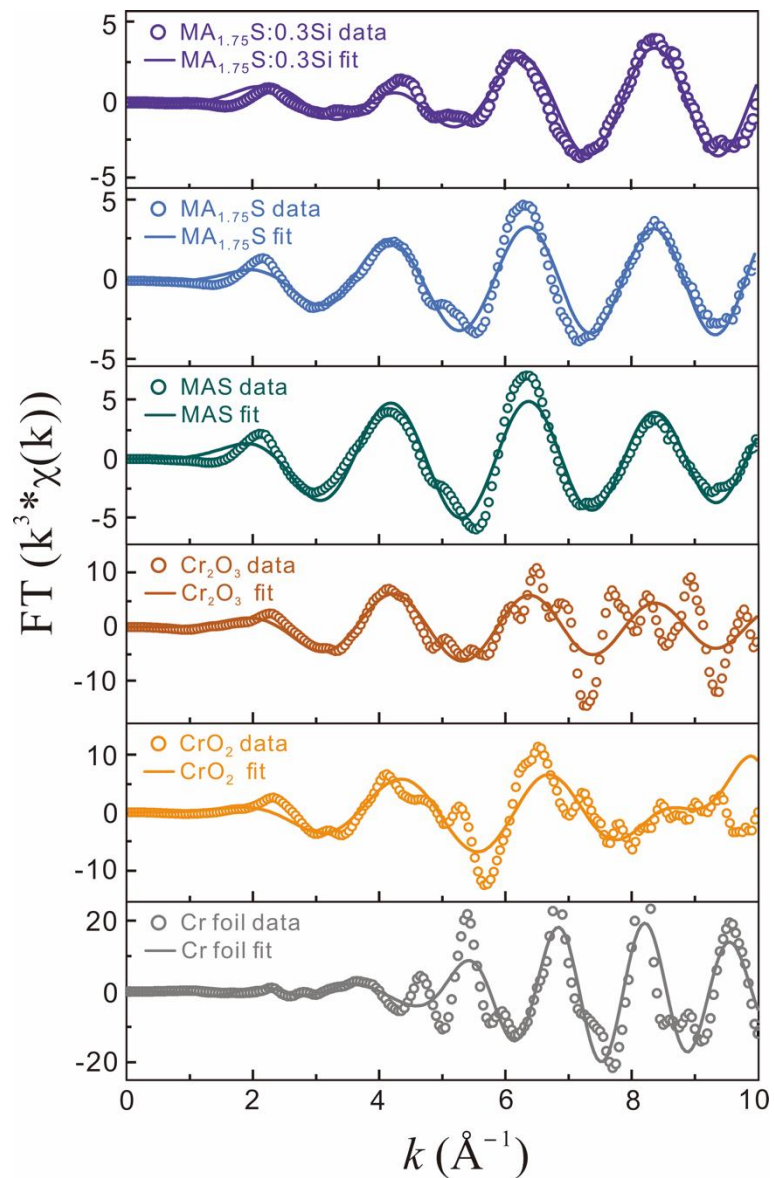

**Supplementary Fig. 21** The  $k^3$ -weighted EXAFS data in  $k$  space. The  $k^3$  weighting,  $k$ -range of 0–10.0  $\text{\AA}^{-1}$  and  $R$  range of  $\sim 1.0$ – $3.0$   $\text{\AA}$  were used for the fitting. The fitting results coincide with the measured ones very well, indicating that the data is reliable.

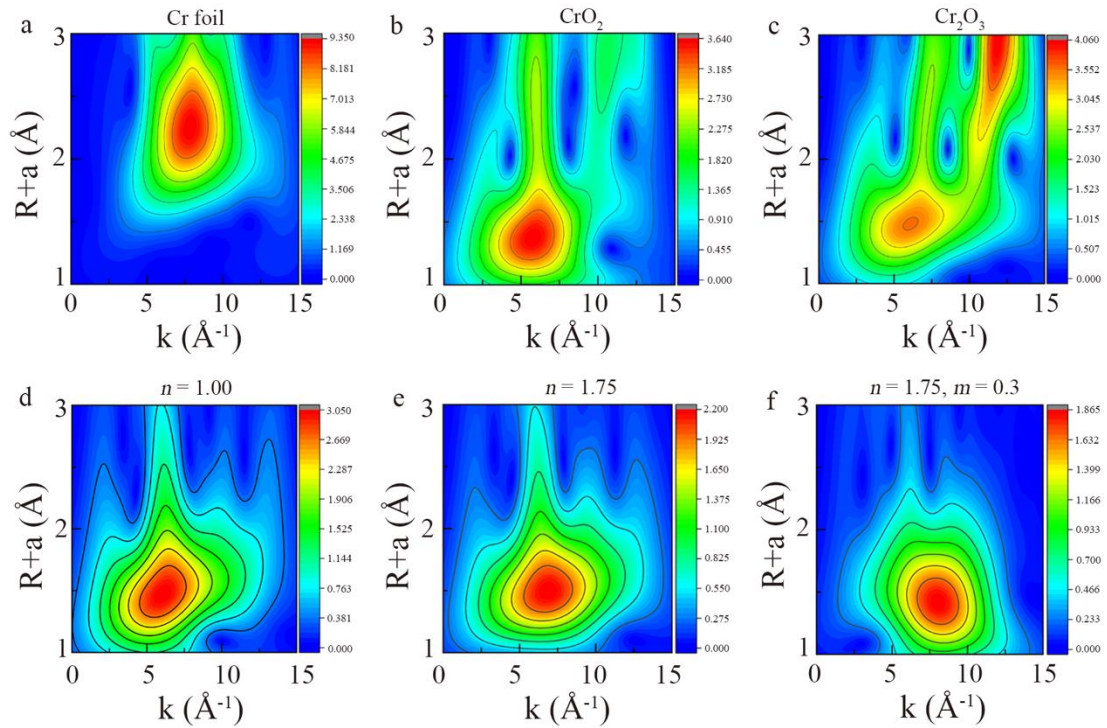

**Supplementary Fig. 22** Wavelet transforms for the  $k^3$ -weighted Cr  $K$ -edge EXAFS signals. **a–c**, The standard samples. **d–f**, Three representative samples, MAS:2%Cr<sup>3+</sup> (**d**) MA<sub>1.75</sub>S:2%Cr<sup>3+</sup> (**e**) and MA<sub>1.75</sub>S:2%Cr<sup>3+</sup>,0.3Si (**f**). For Wavelet Transform analysis, the  $\chi(k)$  exported from Athena was imported into the Hama Fortran code (Phys. Rev. B 71, 094110 (2005)). The parameters were listed as follow:  $R$  range, 1–3.0 Å,  $k$  range, 0–15 Å<sup>-1</sup>;  $k$  weight, 3; and Morlet function with  $\kappa = 5$ ,  $\sigma = 1$  was used as the mother wavelet to provide the overall distribution.

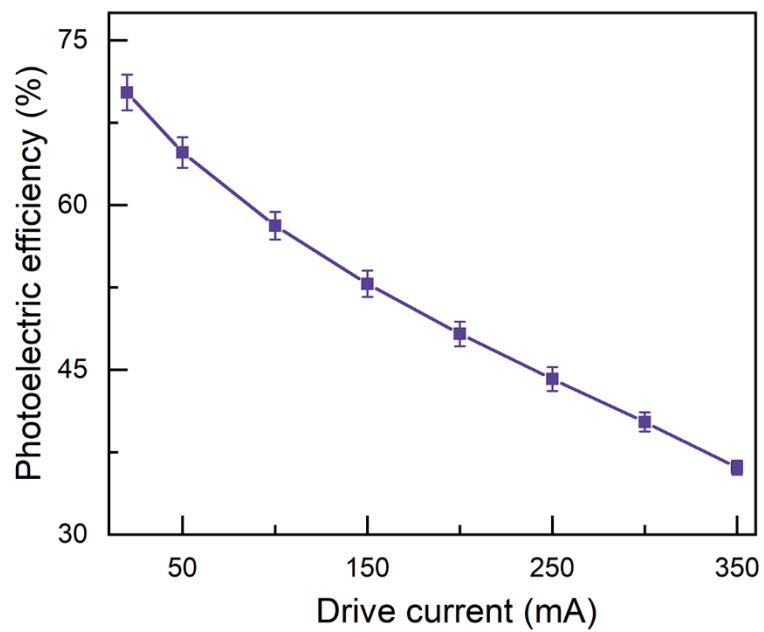

**Supplementary Fig. 23 The photoelectric efficiency of 450 nm LED chips as a function of driving current.** Error bars represent the range of efficiency values after measuring five different LED chips.

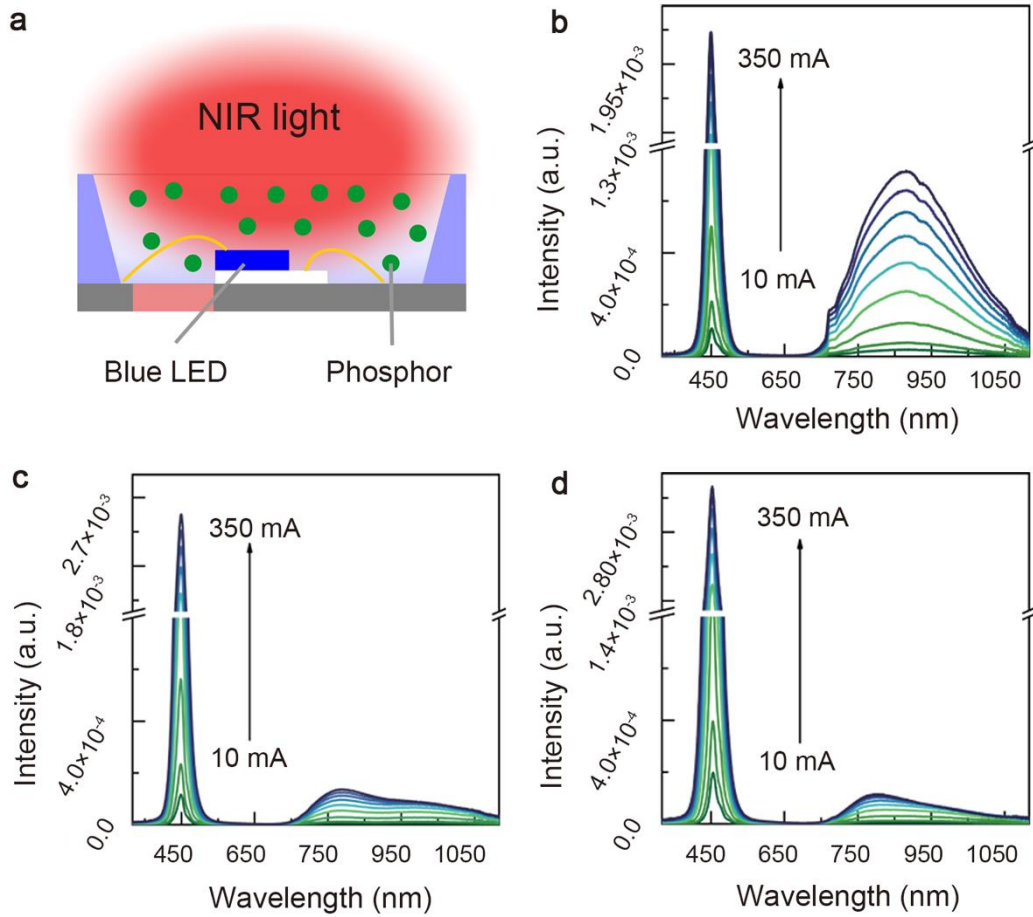

**Supplementary Fig. 24 Fabrication and characterization of NIR pc-LEDs.** **a**, Schematic of NIR pc-LED. **b–d**, EL spectra of pc-LED devices under different drive currents, including the as-fabricated pc-LED (**b**), SFH 4737 (**c**) and LUXEON IR ONYX (**d**).

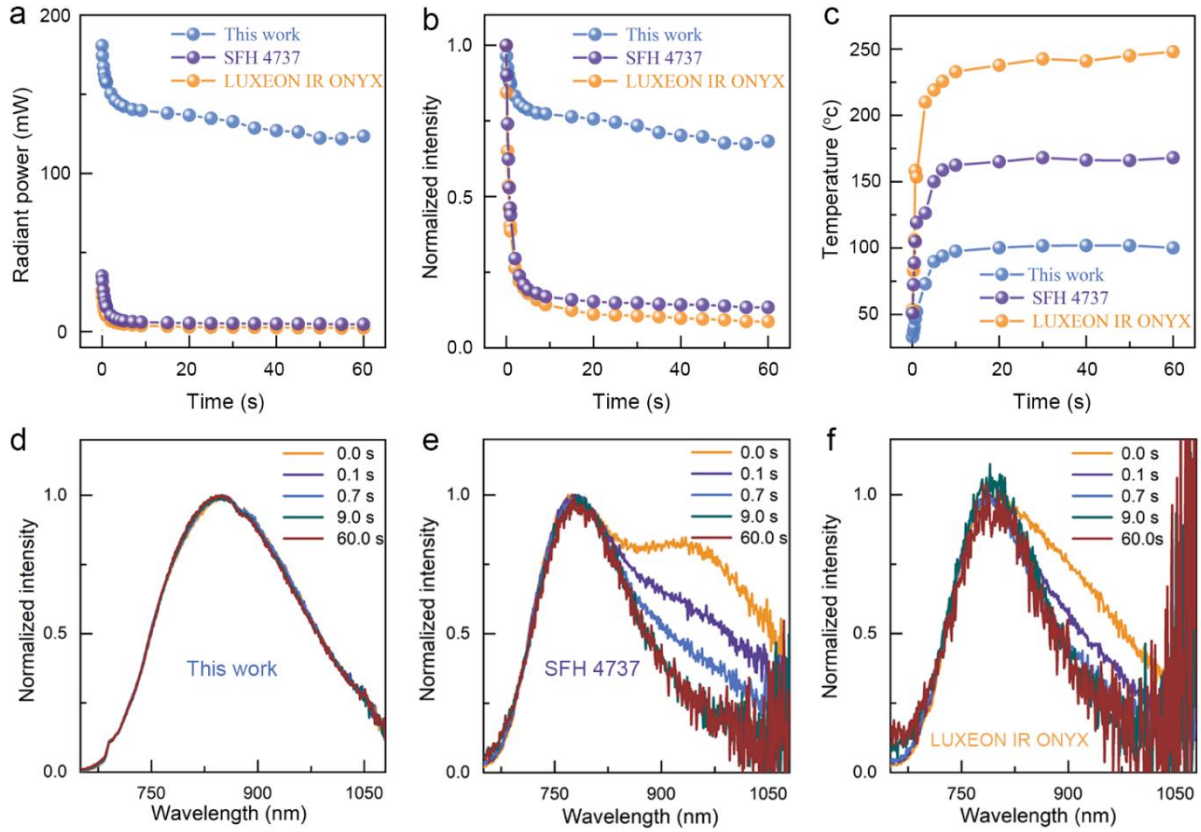

**Supplementary Fig. 25 Lighting-time-dependent photoelectric properties of NIR pc-LEDs at a fixed current of 350 mA.** **a,b** The absolute (**a**) and normalized (**b**) NIR optical power of the as-fabricated pc-LED and two commercial products measured after lighting for varying times. **c**, The surface temperature of the devices. **d,e,f**, The normalized EL spectra of our work (**d**), SFH 4737 (**e**) and LUXEON IR ONYX (**f**) after different lighting times. Note that we did not use any thermal conductors to dissipate the heat generated by the pc-LED devices so that the rise of temperatures can be accelerated. All these devices show a reduction in NIR optical power/photoelectric efficiency with increasing the lighting time ( $t$ ), especially when  $t < 10$  s; accordingly, their operating temperatures show a gradual increase, and a much faster increase when  $t < 10$  s. Notably, when the thermal equilibrium is achieved at  $t > 20$  s, the corresponding temperature is much smaller for our device, which is mainly due to the high photoelectric efficiency; the relative decrements (compared with that at  $t = 0$  s) of the NIR optical power/photoelectric efficiency are also smaller for our device; besides, similar to the current-dependent EL spectra (Fig. 4c in the manuscript), the time-dependent EL spectra of our device operated at 350 mA show negligible change in profile, whereas for the commercial ones, the relative EL intensity of the long-wavelength emission decreases clearly. These

results undoubtedly confirm the superior thermal stability as well as the high conversion efficiency of the developed phosphor.

## Supplementary Tables

**Table S1** Details of Rietveld refinement crystallographic data for MA<sub>n</sub>S:2.0%Cr<sup>3+</sup>.

| Crystallographic Data               |              |              |              |              |              |
|-------------------------------------|--------------|--------------|--------------|--------------|--------------|
| <i>n</i>                            | 1.00         | 1.25         | 1.50         | 1.75         | 2.00         |
| Lattice parameter, <i>a</i><br>(Å)  | 8.089377(17) | 8.065470(15) | 8.043050(19) | 8.027517(19) | 8.015018(24) |
| Volume(Å <sup>3</sup> )             | 529.3529(33) | 524.6733(30) | 520.3102(36) | 517.3015(37) | 514.8890(47) |
| <i>R</i> <sub>wp</sub>              | 5.76%        | 5.16%        | 4.87%        | 5.26%        | 5.70%        |
| <i>R</i> <sub>p</sub>               | 4.20%        | 3.87%        | 3.51%        | 3.57%        | 3.93%        |
| <i>Gof</i>                          | 2.43         | 2.17         | 2.04         | 2.23         | 1.95         |
| Site occupancy fractions:           |              |              |              |              |              |
| Mg(1/8,1/8,1/8)                     | 0.584        | 0.522        | 0.388        | 0.294        | 0.270        |
| Al(1/8,1/8,1/8)                     | 0.416        | 0.478        | 0.612        | 0.706        | 0.730        |
| Mg(1/2,1/2,1/2)                     | 0.208        | 0.289        | 0.306        | 0.352        | 0.364        |
| Al(1/2,1/2,1/2)                     | 0.792        | 0.711        | 0.694        | 0.647        | 0.635        |
| Cr(1/2, 1/2, 1/2)                   | 0.010        | 0.010        | 0.010        | 0.010        | 0.010        |
| Isotropic temperature factor, Biso: |              |              |              |              |              |
| Mg/Al(1/8,1/8,1/8)                  | 1.050(36)    | 1.263(34)    | 0.674(33)    | 0.907(35)    | 0.716(37)    |
| Al/Mg(1/2,1/2,1/2)                  | 0.731(29)    | 0.802(30)    | 1.342(41)    | 1.538(46)    | 1.699(48)    |
| O ( <i>u, u, u</i> )                | 0.618(61)    | 0.200(61)    | 0.200(84)    | 0.200(93)    | 0.200(93)    |

**Table S2** EDS results of MAS:2.0%Cr<sup>3+</sup>, MA<sub>1.75</sub>S:2.0%Cr<sup>3+</sup>, and MA<sub>1.75</sub>S:2.0%Cr<sup>3+</sup>, 0.30Si.

| Samples                                            | Elements | Atomic Fraction | Errors |
|----------------------------------------------------|----------|-----------------|--------|
| MAS:2.0%Cr <sup>3+</sup>                           | Mg       | 13.76%          | 3.28%  |
|                                                    | Al       | 28.89%          | 6.86%  |
|                                                    | O        | 56.52%          | 7.44%  |
|                                                    | Cr       | 0.82%           | 0.15%  |
| MA <sub>1.75</sub> S:2.0%Cr <sup>3+</sup>          | Mg       | 9.57%           | 2.33%  |
|                                                    | Al       | 33.12%          | 8.06%  |
|                                                    | O        | 56.51%          | 8.04%  |
|                                                    | Cr       | 0.80%           | 0.16%  |
| MA <sub>1.75</sub> S:2.0%Cr <sup>3+</sup> , 0.30Si | Mg       | 8.19%           | 1.88%  |
|                                                    | Al       | 26.29%          | 6.03%  |
|                                                    | Si       | 3.32%           | 0.75%  |
|                                                    | O        | 61.67%          | 7.23%  |
|                                                    | Cr       | 0.53%           | 0.09%  |

**Table S3** The fitting parameters of PL decay curves for MAS: $x\%Cr^{3+}$  monitoring 689 nm.

| $x\%$ | $A_1$ | $\tau_1$ | $A_2$ | $\tau_2$ | $A_3$ | $\tau_3$ | $I_0$                 | $R^2$   |
|-------|-------|----------|-------|----------|-------|----------|-----------------------|---------|
| 0.5   | 0.21  | 1.24     | 0.47  | 4.93     | 0.26  | 13.12    | $8.98 \times 10^{-5}$ | 0.99965 |
| 1.0   | 0.17  | 0.67     | 0.46  | 3.74     | 0.31  | 11.69    | $0.01 \times 10^{-6}$ | 0.99962 |
| 3.0   | 0.24  | 0.36     | 0.47  | 1.24     | 0.09  | 3.43     | $4.02 \times 10^{-4}$ | 0.99964 |
| 6.0   | 61.63 | 0.03     | 0.10  | 0.13     | 0.01  | 0.77     | $9.07 \times 10^{-5}$ | 0.99942 |
| 10.0  | 0.46  | 0.01     | 2.98  | 0.01     | 0.03  | 0.05     | $2.90 \times 10^{-4}$ | 0.99768 |

The PL decay curves were best fitted to triple-exponential functions, which could be described by the following equation:

$$I(t) = A_1 \exp\left(-\frac{t}{\tau_1}\right) + A_2 \exp\left(-\frac{t}{\tau_2}\right) + A_3 \exp\left(-\frac{t}{\tau_3}\right) + I_0 \quad (1)$$

According to eqn (1), the average lifetime  $\tau_{ave}$  is given by:

$$\tau_{ave} = \frac{A_1\tau_1^2 + A_2\tau_2^2 + A_3\tau_3^2}{A_1\tau_1 + A_2\tau_2 + A_3\tau_3} \quad (2)$$

According to eqn (2), the average lifetimes of the 689 nm luminescence were calculated and given in Supplementary Fig. 4.

**Table S4** IQE, AE, and EQE values of MAS: $x\%Cr^{3+}$ .

| $x$ | IQE (%) | AE (%) | EQE (%) |
|-----|---------|--------|---------|
| 1   | 98      | 19     | 19      |
| 3   | 79      | 34     | 27      |
| 6   | 47      | 40     | 19      |
| 10  | 27      | 44     | 12      |

**Table S5** IQE, AE, and EQE values of ZAS: $x\%Cr^{3+}$ .

| $x$ | IQE (%) | AE (%) | EQE (%) |
|-----|---------|--------|---------|
| 1   | 98      | 20     | 20      |
| 3   | 90      | 33     | 30      |
| 6   | 14      | 39     | 5       |
| 10  | 10      | 43     | 4       |

**Table S6** IQE, AE, and EQE values of LAS: $x\%Cr^{3+}$ .

| $x$ | IQE (%) | AE (%) | EQE (%) |
|-----|---------|--------|---------|
| 0.5 | 81      | 27     | 22      |
| 1.0 | 76      | 30     | 23      |
| 3.0 | 70      | 41     | 29      |
| 5.0 | 39      | 46     | 18      |

**Table S7** IQE, AE, and EQE values of MGS: $x\%Cr^{3+}$ .

| $x$ | IQE (%) | AE (%) | EQE (%) |
|-----|---------|--------|---------|
| 1   | 98      | 34     | 33      |
| 3   | 82      | 46     | 38      |
| 6   | 41      | 50     | 21      |
| 10  | 14      | 52     | 7       |

**Table S8** IQE, AE, and EQE values of ZGS: $x\%Cr^{3+}$ .

| $x$ | IQE (%) | AE (%) | EQE (%) |
|-----|---------|--------|---------|
| 1   | 97      | 33     | 32      |
| 3   | 78      | 43     | 34      |
| 6   | 12      | 47     | 6       |
| 10  | 1       | 49     | 1       |

**Table S9** IQE, AE, and EQE values of LGS: $x\%Cr^{3+}$ .

| $x$ | IQE (%) | AE (%) | EQE (%) |
|-----|---------|--------|---------|
| 0.5 | 100     | 31     | 31      |
| 1.0 | 99      | 36     | 36      |
| 3.0 | 88      | 46     | 40      |
| 5.0 | 53      | 52     | 28      |

**Table S10** Crystal field parameters of Cr<sup>3+</sup> in MA<sub>1.75</sub>S:0.1%Cr<sup>3+</sup>.

| $E(^4A_2 \rightarrow ^4T_1)$<br>(cm <sup>-1</sup> ) | $E(^4A_2 \rightarrow ^4T_2)$<br>(cm <sup>-1</sup> ) | $E(^4T_2 \rightarrow ^4A_2)$<br>(cm <sup>-1</sup> ) | $E(^2E \rightarrow ^4A_2)$<br>(cm <sup>-1</sup> ) | $\Delta E$<br>(cm <sup>-1</sup> ) | $Dq$<br>(cm <sup>-1</sup> ) | $B$<br>(cm <sup>-1</sup> ) | $Dq/B$ |
|-----------------------------------------------------|-----------------------------------------------------|-----------------------------------------------------|---------------------------------------------------|-----------------------------------|-----------------------------|----------------------------|--------|
| 23255                                               | 16129                                               | 11627                                               | /                                                 | 7126                              | 1388                        | 807                        | 1.72   |
| 24570                                               | 18622                                               | /                                                   | 14513                                             | 5948                              | 1657                        | 577                        | 2.87   |

The crystal field parameters were calculated by using the following formulas:

$$\Delta E = E(4A_2 \rightarrow 4T_1) - E(4A_2 \rightarrow 4T_2) \quad (1)$$

$$\Delta S = E(4A_2 \rightarrow 4T_2) - E(4T_2 \rightarrow 4A_2) \quad (2)$$

$$10Dq = E(4A_2 \rightarrow 4T_2) - \frac{\Delta S}{2} \quad (3)$$

$$\frac{Dq}{B} = \frac{15 \times \left( \frac{\Delta E}{Dq} - 8 \right)}{\left( \frac{\Delta E}{Dq} \right)^2 - 10 \times \frac{\Delta E}{Dq}} \quad (4)$$

where  $Dq$  is the crystal field strength parameter and  $B$  is Racah electron repulsion parameter; the values of  $E(^4A_{2g} \rightarrow ^4T_{1g})$  and  $E(^4A_{2g} \rightarrow ^4T_{2g})$  were calculated from the corresponding peak energy of the PLE band, and  $\Delta E$  represents the energy difference between the two energy levels  $E(^4A_{2g} \rightarrow ^4T_{1g})$  and  $E(^4A_{2g} \rightarrow ^4T_{2g})$ . The Stokes shift ( $\Delta S$ ) was calculated from the peak position of the PLE band corresponding to  $E(^4A_{2g} \rightarrow ^4T_{2g})$  and the peak position in the PL spectrum corresponding to  $E(^4T_{2g} \rightarrow ^4A_{2g})$ .

**Table S11** IQE, AE, and EQE values of  $MG_nS:2.0\%Cr^{3+}$ .

| $n$  | IQE (%) | AE (%) | EQE (%) |
|------|---------|--------|---------|
| 1.00 | 93      | 36     | 33      |
| 1.05 | 95      | 38     | 36      |
| 1.10 | 94      | 40     | 38      |
| 1.15 | 92      | 41     | 38      |
| 1.20 | 91      | 42     | 38      |
| 1.50 | 80      | 44     | 35      |

**Table S12** IQE, AE, and EQE values of  $ZG_nS:2.0\%Cr^{3+}$ .

| $n$  | IQE (%) | AE (%) | EQE (%) |
|------|---------|--------|---------|
| 1.00 | 92      | 40     | 37      |
| 1.25 | 92      | 41     | 38      |
| 1.50 | 90      | 42     | 38      |
| 1.75 | 93      | 44     | 41      |

**Table S13** IQE, AE, and EQE values of  $ZA_nS:2.0\%Cr^{3+}$ .

| $n$  | IQE (%) | AE (%) | EQE (%) |
|------|---------|--------|---------|
| 1.00 | 96      | 31     | 30      |
| 1.25 | 84      | 31     | 26      |
| 1.50 | 78      | 33     | 26      |
| 1.75 | 80      | 34     | 27      |

**Table S14** Calculated inversion parameters (*i*) of MA<sub>*n*</sub>S:2.0%Cr<sup>3+</sup> based on NMR, FTIR, and Raman spectra, respectively.

| <i>n</i> | NMR  | FTIR | Raman |
|----------|------|------|-------|
| 1.00     | 0.17 | 0.19 | 0.25  |
| 1.15     | 0.22 | 0.22 | 0.30  |
| 1.50     | 0.26 | 0.35 | 0.31  |
| 1.75     | 0.29 | 0.39 | 0.32  |
| 2.00     | 0.31 | 0.40 | 0.33  |

**Table S15** IQE, AE, and EQE values of MA<sub>n</sub>S:0.5%Cr<sup>3+</sup>.

| <i>n</i> | IQE (%) | AE (%) | EQE (%) |
|----------|---------|--------|---------|
| 1.00     | 100     | 17     | 17      |
| 1.15     | 99      | 18     | 18      |
| 1.50     | 97      | 21     | 20      |
| 1.75     | 98      | 24     | 24      |
| 2.00     | 91      | 26     | 24      |

**Table S16** IQE, AE, and EQE values of MA<sub>1.75</sub>S:*x*%Cr<sup>3+</sup>.

| <i>x</i> | IQE (%) | AE (%) | EQE (%) |
|----------|---------|--------|---------|
| 0.5      | 98      | 24     | 24      |
| 1.0      | 96      | 31     | 30      |
| 2.0      | 95      | 35     | 33      |
| 3.0      | 82      | 40     | 33      |
| 6.0      | 65      | 49     | 32      |
| 10.0     | 40      | 54     | 22      |

**Table S17.** The total elastic moduli (kBar) of MAS:2.0%Cr<sup>3+</sup> ( $\Theta_D = 804.1$  K).

| Direction | XX        | YY        | ZZ        | XY        | YZ        | ZX        |
|-----------|-----------|-----------|-----------|-----------|-----------|-----------|
| XX        | 2582.9115 | 1446.9760 | 1446.9760 | 0.0000    | 0.0000    | 0.0000    |
| YY        | 1446.9760 | 2582.9115 | 1446.9760 | 0.0000    | 0.0000    | 0.0000    |
| ZZ        | 1446.9760 | 1446.9760 | 2582.9115 | 0.0000    | 0.0000    | 0.0000    |
| XY        | 0.0000    | 0.0000    | 0.0000    | 1285.5422 | 0.0000    | 0.0000    |
| YZ        | 0.0000    | 0.0000    | 0.0000    | 0.0000    | 1285.5422 | 0.0000    |
| ZX        | 0.0000    | 0.0000    | 0.0000    | 0.0000    | 0.0000    | 1285.5422 |

The Perdew–Burke–Ernzerhof (PBE) exchange–correlation functional was employed for stress tensor calculation to estimate the Debye temperature ( $\Theta_D$ ).<sup>76,77</sup> With the calculated elastic constants, it is possible to estimate the Debye temperature using the following equations:

$$\Theta_D = \frac{h}{k} \left( \frac{3n N_A \rho}{4\pi M} \right)^{\frac{1}{3}} v_m \quad (1)$$

$$v_m = \left[ \frac{1}{3} \left( \frac{2}{v_t^3} + \frac{1}{v_l^3} \right) \right]^{-\frac{1}{3}} \quad (2)$$

$$v_l = \sqrt{\frac{3B + 4G}{3\rho}}, \quad v_t = \sqrt{\frac{G}{\rho}} \quad (3)$$

where  $h = 6.626 \times 10^{-34}$  J·s is the Planck's constant;  $k_B = 1.381 \times 10^{-23}$  J·K<sup>-1</sup> is the Boltzmann constant;  $N_A = 6.022 \times 10^{23}$  mol<sup>-1</sup> is the Avogadro's number;  $\rho$  is the crystal's density;  $n$  is the number of atoms per one formula unit, and  $M$  is the formula weight. The average, transverse and longitudinal sound velocities are denoted by  $v_m$ ,  $v_t$ ,  $v_l$ , correspondingly. The B (bulk modulus) and G (shear modulus) values are calculated as the average values of the corresponding Voigt and Reuss (denoted with the V and R subscripts, respectively) values from Tables S17, S18 and S21. With these equations and calculated elastic parameters, the Debye temperatures for MAS:2.0%Cr<sup>3+</sup>, MA<sub>3.5</sub>S:2.0%Cr<sup>3+</sup>, and MA<sub>3.5</sub>S:2.0%Cr<sup>3+</sup>,0.3Si were estimated to be 804.1 K, 872.8 K, and 833.5 K, respectively.

**Table S18.** The total elastic moduli (kBar) of MA<sub>1.75</sub>S:2.0%Cr<sup>3+</sup> ( $\Theta_D = 872.8$  K).

| Direction | XX        | YY        | ZZ        | XY        | YZ        | ZX        |
|-----------|-----------|-----------|-----------|-----------|-----------|-----------|
| XX        | 2866.0089 | 1366.0795 | 1364.7012 | -3.4731   | -15.0543  | -5.3017   |
| YY        | 1366.0795 | 2850.3892 | 1367.5904 | -2.5211   | 11.9341   | -0.0573   |
| ZZ        | 1364.7012 | 1367.5904 | 2835.7294 | -5.0897   | 19.1466   | 3.3237    |
| XY        | -3.4731   | -2.5211   | -5.0897   | 1428.1617 | 2.7826    | 19.8723   |
| YZ        | -15.0543  | 11.9341   | 19.1466   | 2.7826    | 1449.1802 | 19.3426   |
| ZX        | -5.3017   | -0.0573   | 3.3237    | 19.8723   | 19.3426   | 1431.6257 |

**Table S19.** Details of Rietveld refinement crystallographic data for MA<sub>1.75</sub>S:2.0%Cr<sup>3+</sup>,*m*Si.

| Crystallographic Data               |              |              |              |             |              |
|-------------------------------------|--------------|--------------|--------------|-------------|--------------|
| <i>m</i>                            | 0.05         | 0.10         | 0.20         | 0.30        | 0.40         |
| Lattice parameter,<br><i>a</i> (Å)  | 8.028551(21) | 8.031283(67) | 8.034529(17) | 8.03836(12) | 8.037022(30) |
| Volume(Å <sup>3</sup> )             | 517.5014(40) | 518.030(13)  | 518.6582(33) | 519.400(23) | 519.1413(57) |
| <i>R</i> <sub>wp</sub>              | 0.051        | 0.054        | 0.058        | 0.113       | 0.070        |
| <i>R</i> <sub>p</sub>               | 0.038        | 0.040        | 0.044        | 0.083       | 0.051        |
| <i>Gof</i>                          | 1.61         | 1.74         | 1.80         | 1.74        | 2.25         |
| Site occupancy fractions:           |              |              |              |             |              |
| Mg (1/8, 1/8, 1/8)                  | 0.250        | 0.225        | 0.125        | 0.772       | 0.559        |
| Al (1/8, 1/8, 1/8)                  | 0.700        | 0.625        | 0.675        | 0.108       | 0.061        |
| Si (1/8, 1/8, 1/8)                  | 0.050        | 0.100        | 0.200        | 0.120       | 0.400        |
| Mg (1/2, 1/2, 1/2)                  | 0.375        | 0.387        | 0.438        | 0.114       | 0.010        |
| Al (1/2, 1/2, 1/2)                  | 0.615        | 0.603        | 0.553        | 0.876       | 0.980        |
| Cr(1/2, 1/2, 1/2)                   | 0.010        | 0.010        | 0.010        | 0.010       | 0.010        |
| Isotropic temperature factor, Biso: |              |              |              |             |              |
| Mg/Al(1/8,1/8,1/8)                  | 0.729(37)    | 0.581(39)    | 0.920(44)    | 0.200(36)   | 0.699(36)    |
| Al/Mg(1/2,1/2,1/2)                  | 1.742(50)    | 1.395(52)    | 1.796(58)    | 0.444(36)   | 1.491(36)    |
| O ( <i>u, u, u</i> )                | 0.200(96)    | 0.200(11)    | 0.380(12)    | 0.371(36)   | 0.200(36)    |

**Table S20** IQE, AE, and EQE values of MA<sub>3.5</sub>S:2.0%Cr<sup>3+</sup>,*m*Si.

| <i>m</i> | IQE (%) | AE (%) | EQE (%) |
|----------|---------|--------|---------|
| 0.00     | 95      | 35     | 33      |
| 0.05     | 94      | 40     | 38      |
| 0.10     | 94      | 46     | 43      |
| 0.20     | 95      | 52     | 49      |
| 0.30     | 94      | 55     | 52      |
| 0.40     | 90      | 54     | 49      |

**Table S21** The total elastic moduli (kBar) of MA<sub>1.75</sub>S:2.0%Cr<sup>3+</sup>,0.3Si ( $\theta_D = 833.5$  K).

| Direction | XX        | YY        | ZZ        | XY        | YZ        | ZX        |
|-----------|-----------|-----------|-----------|-----------|-----------|-----------|
| XX        | 2742.4939 | 1041.4702 | 1033.6552 | 101.4221  | 153.7186  | -28.0104  |
| YY        | 1041.4702 | 2960.3784 | 1019.3803 | 138.8917  | 46.4304   | -108.7923 |
| ZZ        | 1033.6552 | 1019.3803 | 2714.7605 | 187.3961  | 49.3729   | -35.8546  |
| XY        | 101.4221  | 138.8917  | 187.3961  | 1132.6064 | 29.2517   | 55.6608   |
| YZ        | 153.7186  | 46.4304   | 49.3729   | 29.2517   | 1208.1090 | 79.8732   |
| ZX        | -28.0104  | -108.7923 | -35.8546  | 55.6608   | 79.8732   | 1235.9351 |

**Table S22** EXAFS fitting parameters at the Cr *K*-edge for samples. ( $S_0^2=0.7$ )

| Sample                                           | Path   | $N^a$ | $R(\text{\AA})^b$ | $\sigma^2(\text{\AA}^2)^c$ | $\Delta E_0(\text{eV})^d$ | <i>R</i> factor |
|--------------------------------------------------|--------|-------|-------------------|----------------------------|---------------------------|-----------------|
| Cr foil                                          | Cr-Cr1 | 8.00  | 2.49              | 0.0068                     | 3.48                      | 0.0378          |
|                                                  | Cr-Cr2 | 6.00  | 2.86              | 0.0050                     | 3.48                      |                 |
| CrO <sub>2</sub>                                 | Cr-O1  | 2.00  | 1.77              | 0.0124                     | -8.41                     | 0.0122          |
|                                                  | Cr-O2  | 4.20  | 1.93              | 0.0087                     | -5.21                     |                 |
| Cr <sub>2</sub> O <sub>3</sub>                   | Cr-O1  | 3.00  | 1.95              | 0.0053                     | -3.20                     | 0.0183          |
|                                                  | Cr-O2  | 3.00  | 2.00              | 0.0029                     | -9.05                     |                 |
| MA <sub>2.0</sub> S:2.0%Cr <sup>3+</sup>         | Cr-O   | 5.64  | 1.98              | 0.0030                     | -8.55                     | 0.0132          |
| MA <sub>3.5</sub> S:2.0%Cr <sup>3+</sup>         | Cr-O1  | 3.00  | 1.71              | 0.0052                     | -7.19                     | 0.0163          |
|                                                  | Cr-O2  | 3.00  | 1.97              | 0.0003                     | -7.19                     |                 |
| MA <sub>3.5</sub> S:2.0%Cr <sup>3+</sup> ,0.30Si | Cr-O1  | 3.07  | 1.67              | 0.0138                     | -8.11                     | 0.0128          |
|                                                  | Cr-O2  | 3.21  | 1.96              | 0.0015                     | -8.11                     |                 |

<sup>a</sup>*CN*, coordination number; <sup>b</sup>*R*, distance between absorber and backscatter atoms; <sup>c</sup> $\sigma^2$ , Debye-Waller factor to account for both thermal and structural disorders; <sup>d</sup> $\Delta E_0$ , inner potential correction; *R* factor indicates the goodness of the fit. According to the experimental EXAFS fit of Cr foil by fixing *CN* as the known crystallographic value.

Fitting range:  $3.0 \leq k (\text{\AA}) \leq 12.5$  and  $1.5 \leq R (\text{\AA}) \leq 3.5$  (Cr foil);  $3.0 \leq k (\text{\AA}) \leq 9.4$ ;  $3.0 \leq k (\text{\AA}) \leq 10.4$  and  $1.0 \leq R (\text{\AA}) \leq 2.3$  (Cr<sub>2</sub>O<sub>3</sub>);  $3.0 \leq k (\text{\AA}) \leq 12.3$  and  $1.0 \leq R (\text{\AA}) \leq 2.5$  (MA<sub>2.0</sub>: 2%Cr<sup>3+</sup>);  $3.0 \leq k (\text{\AA}) \leq 11.0$  and  $1.0 \leq R (\text{\AA}) \leq 1.9$  (MA<sub>3.5</sub>: 2%Cr<sup>3+</sup>);  $2.8 \leq k (\text{\AA}) \leq 10.2$  and  $1.0 \leq R (\text{\AA}) \leq 2.0$  (MA<sub>3.5</sub>S<sub>0.3</sub>: 2%Cr<sup>3+</sup>). The four parameters, coordination number, bond length, Debye-Waller factor and  $E_0$  shift (*CN*, *R*,  $\sigma^2$ ,  $\Delta E_0$ ) were fitted and partially fixed.

**Table S23 Comparison of PL properties, price, device efficiency with the reported works.** Note that the price mentioned here only approximately estimates the cost of the raw materials for these phosphors, and the device efficiency ( $\eta$ ) was the NIR photoelectric efficiency of the corresponding pc-LED device at the rated current (or the maximum current used).

| Phosphors                                                                               | Price  | $\lambda_{PL}$ (nm) | IQE (%) | FWHM (nm) | $I_{150^\circ C}$ (%) | $\eta$ (%) | Ref.      |
|-----------------------------------------------------------------------------------------|--------|---------------------|---------|-----------|-----------------------|------------|-----------|
| MA <sub>1.75</sub> S:2.0%Cr <sup>3+</sup> ,0.3Si                                        | low    | 850                 | 94      | 265       | 77                    | 16         | This work |
| MA <sub>1.75</sub> S:1.0%Cr <sup>3+</sup> ,0.3Si                                        | low    | 828                 | 96      | 281       | 81                    | /          | This work |
| K <sub>3</sub> LuSi <sub>2</sub> O <sub>7</sub> :Eu <sup>2+</sup>                       | high   | 740                 | 15      | 160       | 59                    | 7          | 1         |
| Sr <sub>3</sub> Li <sub>4</sub> Si <sub>2</sub> N <sub>6</sub> :Eu <sup>2+</sup>        | high   | 800                 | 30      | 150       | /                     | 7          | 2         |
| MgAlGa <sub>0.7</sub> B <sub>0.3</sub> O <sub>4</sub> :Cr <sup>3+</sup>                 | middle | 800                 | 94      | 260       | 85                    | 6          | 7         |
| CaS:Eu <sup>2+</sup> -Tb <sup>3+</sup>                                                  | middle | 810                 | 10      | 195       | < 50                  | 2          | 3         |
| La <sub>2</sub> MgZrO <sub>6</sub> :Cr <sup>3+</sup>                                    | middle | 825                 | 58      | 210       | 53                    | /          | 4         |
| GaTaO <sub>4</sub> :Cr <sup>3+</sup>                                                    | high   | 840                 | 91      | 140       | 60                    | 4          | 5         |
| Mg <sub>4</sub> Ta <sub>2</sub> O <sub>9</sub> :Cr <sup>3+</sup>                        | middle | 842                 | 87      | 167       | 30                    | 10         | 6         |
| MgAlGa <sub>0.7</sub> B <sub>0.3</sub> O <sub>4</sub> :Cr <sup>3+</sup>                 | middle | 800                 | 94      | 260       | 85                    | 6          | 7         |
| La <sub>3</sub> Ga <sub>5</sub> GeO <sub>14</sub> :Cr <sup>3+</sup>                     | middle | 850                 | 30      | 330       | 90                    | 2          | 8         |
| Mg <sub>1.2</sub> Ga <sub>1.8</sub> O <sub>3.8</sub> F <sub>0.2</sub> :Cr <sup>3+</sup> | middle | 870                 | 93      | 215       | 85                    | 9          | 9         |
| LiScGe <sub>2</sub> O <sub>6</sub> :Cr <sup>3+</sup>                                    | high   | 886                 | 73      | 160       | 37                    | 9          | 10        |
| NaScGe <sub>2</sub> O <sub>6</sub> :Cr <sup>3+</sup>                                    | high   | 895                 | 40      | 162       | 20                    | 1          | 11        |
| Ca <sub>2</sub> InSbO <sub>6</sub> :Fe <sup>3+</sup>                                    | middle | 935                 | 87      | 146       | 18                    | < 1        | 12        |
| CaSc <sub>0.85</sub> Al <sub>1.15</sub> SiO <sub>6</sub> :Cr <sup>3+</sup>              | middle | 950                 | 30      | 205       | 50                    | /          | 13        |
| LiIn <sub>2</sub> SbO <sub>6</sub> :Cr <sup>3+</sup>                                    | high   | 970                 | 7       | 225       | 2                     | < 1        | 14        |
| LiScGeO <sub>4</sub> :Cr <sup>3+</sup>                                                  | high   | 1120                | 26      | 300       | 13                    | < 1        | 15        |

## References

1. Qiao, J. W., Zhou, G. J., Zhou, Y. Y., Zhang, Q. Y. & Xia, Z. G. Divalent europium-doped near-infrared-emitting phosphor for light-emitting diodes. *Nat. Commun.* **10**, 5267 (2019).

2. Li, S. X., Amachraa, M., Chen, C., Wang, L., Wang, Z. B., Ong, S. P. *et al.* Efficient near-infrared phosphors discovered by parametrizing the Eu(II) 5d-to-4f energy gap. *Matter* **5**, 1924-1936 (2022).
3. Joos, J.J., Van der Heggen, D., Martin, L.I.D.J. *et al.* Broadband infrared LEDs based on europium-to-terbium charge transfer luminescence. *Nat. Commun.* **11**, 3647 (2020).
4. Zeng, H. T., Zhou, T. L., Wang, L. & Xie, R. J. Two-Site Occupation for Exploring Ultra-Broadband Near-Infrared Phosphor-Double-Perovskite  $\text{La}_2\text{MgZrO}_6:\text{Cr}^{3+}$ . *Chem. Mater.* **31**, 5245-5253 (2019).
5. Zhong, J. Y., Zhuo, Y., Du, F., Zhang, H. S., Zhao, W. R., You, S. H. *et al.* Efficient Broadband Near-Infrared Emission in the  $\text{GaTaO}_4:\text{Cr}^{3+}$  Phosphor. *Adv. Opt. Mater.* **10**, 2101800 (2022).
6. S. Wang, R. Pang, T. Tan, H. Wu, *et al.* Achieving High Quantum Efficiency Broadband NIR  $\text{Mg}_4\text{Ta}_2\text{O}_9:\text{Cr}^{3+}$  Phosphor Through Lithium-Ion Compensation. *Adv. Mater.* **35**, 2300124 (2023).
7. C. Zhong, Y. Xu, X. Wu, S. Yin, *et al.* High Output Power and High Quantum Efficiency in Novel NIR Phosphor  $\text{MgAlGa}_{0.7}\text{B}_{0.3}\text{O}_4:\text{Cr}^{3+}$  with Profound FWHM Variation. *Adv. Mater.* **36**, 2309500 (2024).
8. Rajendran, V., Fang, M.-H., Guzman, G. N. D., Lesniewski, T., Mahlik, S., Grinberg, M. *et al.* Super Broadband Near-Infrared Phosphors with High Radiant Flux as Future Light Sources for Spectroscopy Applications. *ACS Energy Lett.* **3**, 2679-2684 (2018).
9. L. Yao, Q. Jia, S. Yu, C. Liang, *et al.* Simultaneous Absorption and Near-Infrared Emission Enhancement of  $\text{Cr}^{3+}$  Ions in  $\text{MgGa}_2\text{O}_4$  Spinel Oxide via Anionic F-Substitution. *Adv. Optical Mater.* **11**, 2202458 (2023).
10. Chen, X. H., Song, E. H., Zhou, Y. Y., He, F. Q., Yang, J. Q. & Zhang, Q. Y. Distorted octahedral site occupation-induced high-efficiency broadband near-infrared emission in  $\text{LiScGe}_2\text{O}_6:\text{Cr}^{3+}$  phosphor. *J. Mater. Chem. C* **9**, 13640-13646 (2021).
11. Zhou, X. F., Geng, W. Y., Li, J. Y., Wang, Y. C., Ding, J. Y. & Wang, Y. h. An Ultraviolet-Visible and Near-Infrared-Responded Broadband NIR Phosphor and Its NIR Spectroscopy Application. *Adv. Opt. Mater.* **8**, 1902003 (2020).

12. Liu, D. J., Li, G. G., Dang, P. P., Zhang, Q. Q., Wei, Y., Qiu, L. *et al.* Highly efficient Fe<sup>3+</sup>-doped A<sub>2</sub>BB'O<sub>6</sub> (A = Sr<sup>2+</sup>, Ca<sup>2+</sup>; B, B' = In<sup>3+</sup>, Sb<sup>5+</sup>, Sn<sup>4+</sup>) broadband near-infrared-emitting phosphors for spectroscopic analysis. *Light Sci. Appl.* **11**, 112 (2022).
13. Liu, G. C., Molokeev, M. S. & Xia, Z. G. Structural Rigidity Control toward Cr<sup>3+</sup>-Based Broadband Near-Infrared Luminescence with Enhanced Thermal Stability. *Chem. Mater.* **34**, 1376-1384 (2022).
14. Liu, D. J., Li, G. G., Dang, P. P., Zhang, Q. Q., Wei, Y., Lian, H. Z. *et al.* Simultaneous Broadening and Enhancement of Cr<sup>3+</sup> Photoluminescence in LiIn<sub>2</sub>SbO<sub>6</sub> by Chemical Unit Cosubstitution: Night-Vision and Near-Infrared Spectroscopy Detection Applications. *Angew. Chem. Int. Ed. Engl.* **60**, 14644-14649 (2021).
15. Miao, S. H., Liang, Y. J., Zhang, Y., Chen, D. X. & Wang, X. J. Broadband Short-Wave Infrared Light-Emitting Diodes Based on Cr<sup>3+</sup>-Doped LiScGeO<sub>4</sub> Phosphor. *ACS Appl. Mater. Interfaces* **13**, 36011-36019 (2021).
